# Supplementary material for: Histone Citrullination Mediates a Protective Role in Endothelium and Modulates Inflammation
Source: MDPI journal article supplement (doi:10.3390/cells11244070), 2022-12-15
Supplement: s1 [file s1]

## *Supplementary Material and Results*

### **Histone citrullination mediates a protective role in endothelium and modulates inflammation**

Rebeca Osca-Verdegel,<sup>1,2</sup> Jesús Beltrán-García,<sup>3</sup> Ana B. Paes,<sup>2,4</sup> Elena Nacher-Sendra,<sup>2,4</sup> Susana Novella,<sup>2,4</sup> Carlos Hermenegildo,<sup>2,4</sup> Nieves Carbonell,<sup>4,5</sup> José Luis García-Giménez<sup>1,2,4,6\*</sup>, Federico V. Pallardó,<sup>1,2,4</sup>

<sup>1</sup> Centro de Investigación Biomédica en Red de Enfermedades Raras (CIBERER). Instituto de Salud Carlos III. Madrid, Spain, 28029

<sup>2</sup> Departamento de Fisiología. Facultad de Medicina y Odontología. Universitat de València. València, Spain, 46010

<sup>3</sup> Department of Medicine, Division of Regenerative Medicine, University of California, San Diego, La Jolla, CA, USA

<sup>4</sup> Instituto de Investigación Sanitaria INCLIVA. Valencia, Spain, 46010

<sup>5</sup> Hospital Clínic Universitari de València. Valencia, Spain, 46010

<sup>6</sup> EpiDisease S.L. (Spin-Off CIBER-ISCIII), Parc Científic de la Universitat de València, Paterna, Valencia, Spain

Corresponding autor:

José Luis García-Giménez

j.luis.garcia@uv.es



## Supplementary Materials

### 2.5. Histone extraction, purification and in vitro citrullination

Histone citrullination has induced using the PAD Cocktail and different extracellular histone concentrations. The citrullination levels were analyzed by WB and demonstrated that the best condition for citrullination induction was the ratio 1 to 1, same quantity of histones than PAD cocktail (Figure 1A and 1B). Because it is known that almost all histone isoforms can be citrullinated, a WB was performed to confirm which histones are being citrullinated. The figure 1C and 1D shows that histone H4, H2A and H2B can be citrullinated. Figure 1E confirms that the most citrullinated histone was histone H3 as expected.

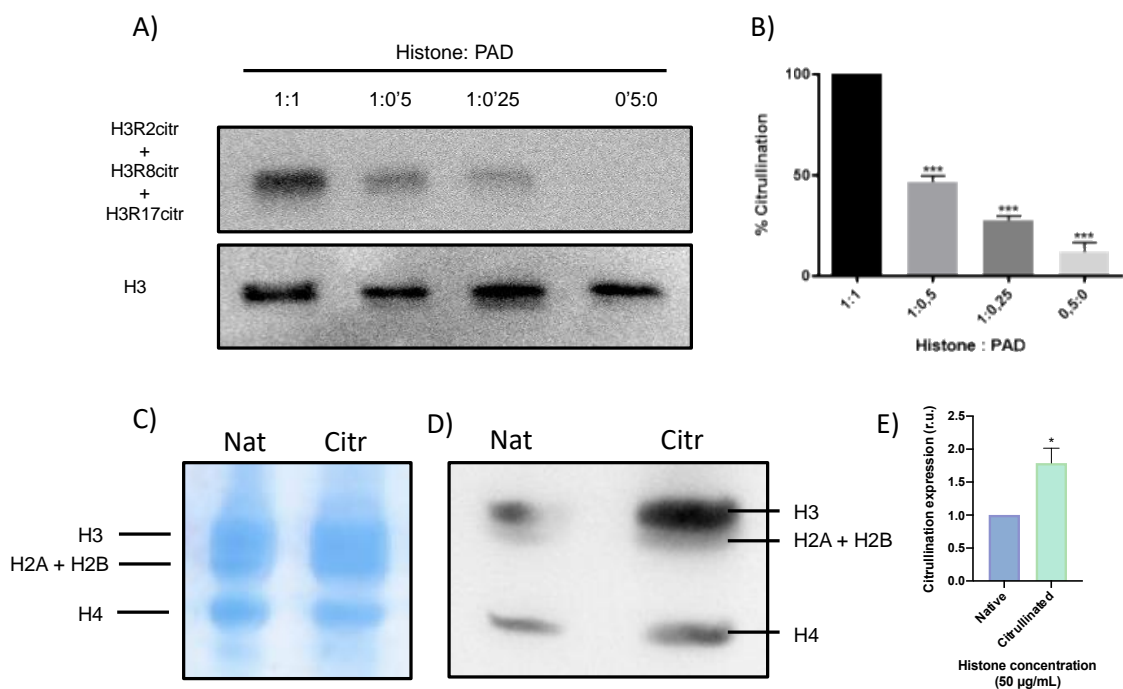

**Supplementary Figure S1.** *In vitro* citrullination. A) WB showing the citrullination obtained using different ratios of Histone:PAD. B) Quantification of citrullination obtained in A. C) Load control of histone citrullination. D) WB obtained for histone citrullination measurements. E) Histone citrullination quantification. Abbreviations: PAD: Peptidylarginine Deiminases; Nat: Native histones.



2.7. Western Blot

Supplementary Table S1. Primary and secondary antibodies employed in WB.

|                      |                      | Antibodies  | Reference                          |
|----------------------|----------------------|-------------|------------------------------------|
| Secondary antibodies | Primary antibodies   | GPX1        | Abcam, ab22604                     |
|                      |                      | Catalase    | Sigma-Aldrich, c0979               |
|                      |                      | MnSOD       | Abcam, ab13533                     |
|                      |                      | Cu/ZnSOD    | Abcam, ab13498                     |
|                      |                      | PGIS        | Santa Cruz Biotechnology, sc-20933 |
|                      |                      | TXAS        | Santa Cruz Biotechnology, sc-79181 |
|                      |                      | eNOS        | Santa Cruz Biotechnology, sc-653   |
|                      |                      | COX-1       | Santa Cruz Biotechnology, sc-19998 |
|                      |                      | COX-2       | Santa Cruz Biotechnology, sc-19999 |
|                      |                      | β-actin     | Sigma-Aldrich, a1978               |
|                      | Secondary antibodies | anti-mouse  | Sigma-Aldrich, NA931V              |
|                      |                      | anti-goat   | Santa Cruz Biotechnology, sc2020   |
|                      |                      | anti-rabbit | Sigma-Aldrich, NA934V              |



## 2.8. RNA isolation and purification and quantitative real-time PCR assay (qRT-PCR)

**Supplementary Table S2.** Probes employed in RTq-PCR analysis.

| Probes        | Reference                        |
|---------------|----------------------------------|
| PGIS-2        | Hs00919949_m1, Life Technologies |
| TBXAS         | Hs01022706_m1, Life Technologies |
| NOS-3         | Hs01574665_m1, Life Technologies |
| V-CAM-1       | Hs01003372_m1, Life Technologies |
| I-CAM-1       | Hs00164932_m1, Life Technologies |
| SEL-E         | Hs00174057_m1, Life Technologies |
| COX-1         | Hs00377726_m1, Life Technologies |
| COX-2         | Hs00153133_m1, Life Technologies |
| IL-1 $\alpha$ | Hs00174092_m1, Life Technologies |
| IL-1 $\beta$  | Hs01555410_m1, Life Technologies |
| IL-6          | Hs00174131_m1, Life Technologies |
| IL-18         | Hs01038788_m1, Life Technologies |
| GAPDH         | Hs02758991_g1, Life Technologies |



## Supplementary Results

### 3.1. Circulating and citrullinated H3 levels are higher in patients with severe phenotypes

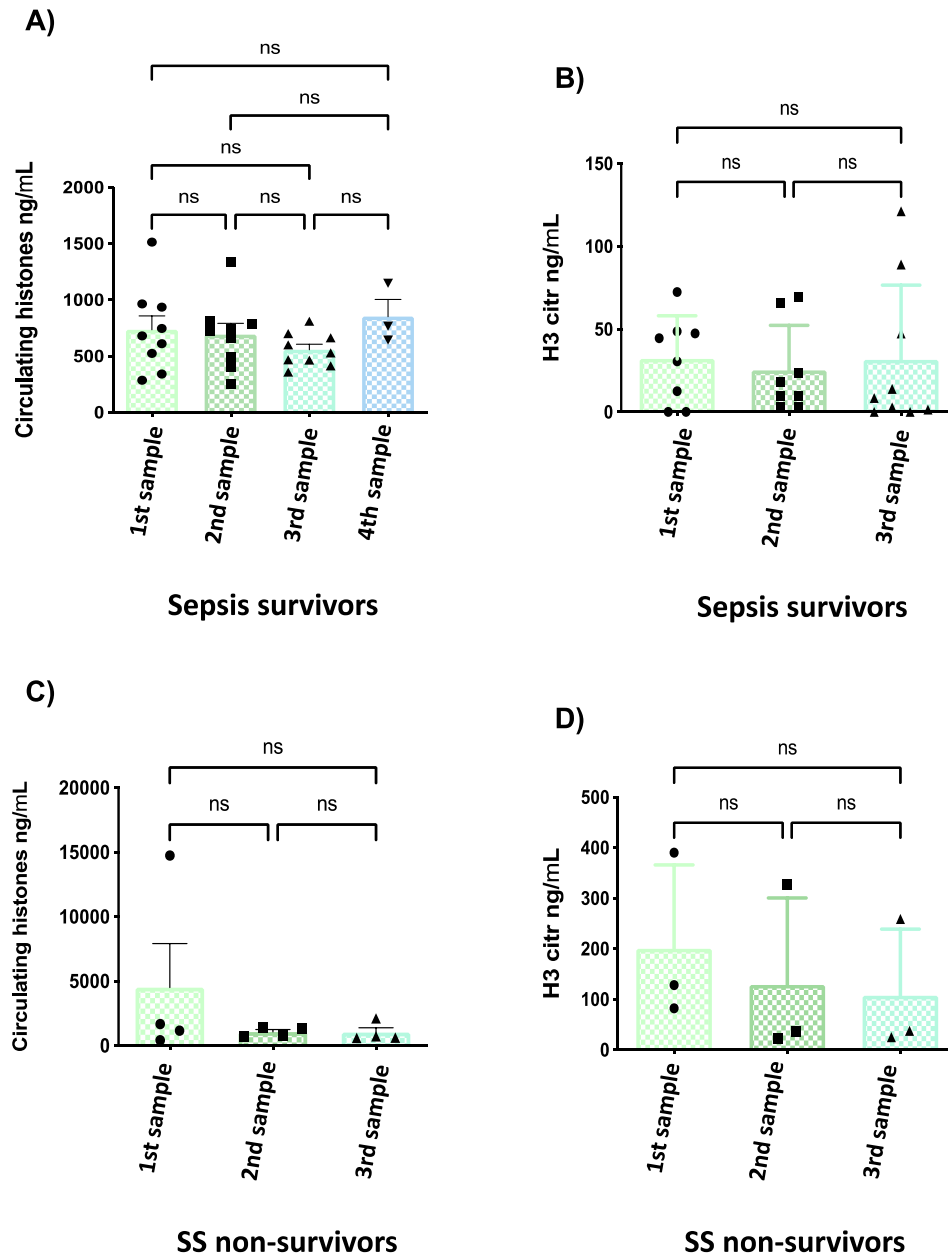

**Supplementary Figure S2. Circulating and citrullinated levels obtained in septic survivors' patients and SS non-survivors.** A and B) Circulating histones evolution along the time in the different patients' groups. H3 citrullinated evolution (C-D) along the time in the different patients' groups. The X-axis shows the samples that were taken during the stay of patients in the ICU: 1st sample (during the first 24-hours of patient admission in the ICU), 2nd sample (after 3 days); 3<sup>rd</sup> sample (after 5 days), 4th sample (pre-discharge or before death). Data are expressed as mean±SEM. ns: not statistically significant. The lines at the top of columns indicate differences between compared conditions. Abbreviation: ns, non-significant p-value.



### 3.2. Correlations between clinical features and circulating and H3 citrullinated histones

**Supplementary Table S3.** Spearman's correlations in sepsis survivor's group, 1<sup>st</sup> sample collected.

|            |                         | Age    | CitrHist-A | CitrH3-A | PCA-A  | Lactate-A | SOFATot-A | APTT-A | PCR-A  | PCT-A  | LEUCO-A | PMN-A  | Plaq-A | Quick-A | DD-A   | TropUS-A | FuncProtC | APACHEII | PROTOTAL | LAC6H  |
|------------|-------------------------|--------|------------|----------|--------|-----------|-----------|--------|--------|--------|---------|--------|--------|---------|--------|----------|-----------|----------|----------|--------|
| Age        | correlation coefficient | 1,000  | -0,119     | 0,309    | 0,282  | 0,032     | 0,470     | -0,205 | -0,589 | 0,068  | -0,168  | -0,616 | -0,088 | 0,086   | -0,404 | 0,635    | 0,205     | 0,632    | -0,158   | 0,088  |
|            | significance            |        | 0,627      | 0,198    | 0,241  | 0,898     | 0,042     | 0,399  | 0,008  | 0,781  | 0,491   | 0,005  | 0,721  | 0,726   | 0,087  | 0,003    | 0,399     | 0,004    | 0,519    | 0,721  |
| CitrHist-A | correlation coefficient | -0,119 | 1,000      | 0,451    | -0,830 | 0,668     | -0,125    | 0,244  | -0,186 | -0,056 | 0,658   | 0,451  | -0,305 | -0,525  | 0,349  | -0,035   | -0,574    | 0,156    | 0,470    | -0,325 |
|            | significance            | 0,627  |            | 0,053    | 0,000  | 0,002     | 0,611     | 0,314  | 0,446  | 0,819  | 0,002   | 0,053  | 0,204  | 0,021   | 0,143  | 0,887    | 0,010     | 0,523    | 0,042    | 0,175  |
| CitrH3-A   | correlation coefficient | 0,309  | 0,451      | 1,000    | -0,251 | 0,772     | -0,125    | 0,542  | -0,279 | 0,421  | 0,372   | 0,035  | -0,154 | 0,074   | -0,214 | 0,105    | -0,346    | 0,175    | 0,063    | 0,100  |
|            | significance            | 0,198  | 0,053      |          | 0,300  | 0,000     | 0,611     | 0,016  | 0,247  | 0,073  | 0,117   | 0,887  | 0,528  | 0,764   | 0,379  | 0,668    | 0,147     | 0,473    | 0,797    | 0,684  |
| PCA-A      | correlation coefficient | 0,282  | -0,830     | -0,251   | 1,000  | -0,500    | 0,075     | -0,053 | 0,091  | 0,189  | -0,618  | -0,481 | 0,323  | 0,514   | -0,456 | 0,153    | 0,775     | -0,125   | -0,453   | 0,295  |
|            | significance            | 0,241  | 0,000      | 0,300    |        | 0,029     | 0,759     | 0,831  | 0,710  | 0,437  | 0,005   | 0,037  | 0,178  | 0,024   | 0,050  | 0,533    | 0,000     | 0,611    | 0,052    | 0,221  |
| Lactate-A  | correlation coefficient | 0,032  | 0,668      | 0,772    | -0,500 | 1,000     | -0,360    | 0,716  | -0,312 | 0,504  | 0,356   | 0,147  | -0,098 | -0,098  | -0,242 | 0,061    | -0,528    | 0,089    | 0,079    | 0,191  |
|            | significance            | 0,898  | 0,002      | 0,000    | 0,029  |           | 0,130     | 0,001  | 0,193  | 0,028  | 0,135   | 0,547  | 0,689  | 0,689   | 0,318  | 0,803    | 0,020     | 0,716    | 0,748    | 0,433  |
| SOFATot-A  | correlation coefficient | 0,470  | -0,125     | -0,125   | 0,075  | -0,360    | 1,000     | -0,453 | -0,465 | -0,756 | -0,170  | -0,472 | -0,526 | -0,002  | 0,068  | 0,554    | 0,198     | 0,596    | 0,295    | -0,425 |
|            | significance            | 0,042  | 0,611      | 0,611    | 0,759  | 0,130     |           | 0,052  | 0,045  | 0,000  | 0,486   | 0,041  | 0,021  | 0,994   | 0,781  | 0,014    | 0,416     | 0,007    | 0,221    | 0,070  |
| APTT-A     | correlation coefficient | -0,205 | 0,244      | 0,542    | -0,053 | 0,716     | -0,453    | 1,000  | 0,074  | 0,575  | -0,065  | 0,091  | -0,102 | 0,189   | -0,321 | -0,025   | -0,247    | -0,168   | 0,114    | 0,337  |
|            | significance            | 0,399  | 0,314      | 0,016    | 0,831  | 0,001     | 0,052     |        | 0,764  | 0,010  | 0,792   | 0,710  | 0,679  | 0,437   | 0,180  | 0,920    | 0,307     | 0,491    | 0,642    | 0,158  |
| PCR-A      | correlation coefficient | -0,589 | -0,186     | -0,279   | 0,091  | -0,312    | -0,465    | 0,074  | 1,000  | 0,074  | 0,056   | 0,435  | 0,233  | -0,044  | 0,454  | -0,432   | 0,012     | -0,386   | 0,058    | 0,096  |
|            | significance            | 0,008  | 0,446      | 0,247    | 0,710  | 0,193     | 0,045     | 0,764  |        | 0,764  | 0,819   | 0,063  | 0,336  | 0,858   | 0,051  | 0,065    | 0,960     | 0,103    | 0,814    | 0,694  |
| PCT-A      | correlation coefficient | 0,068  | -0,056     | 0,421    | 0,189  | 0,504     | -0,756    | 0,575  | 0,074  | 1,000  | -0,002  | 0,005  | 0,440  | 0,181   | -0,574 | -0,112   | -0,130    | -0,196   | -0,463   | 0,675  |
|            | significance            | 0,781  | 0,819      | 0,073    | 0,437  | 0,028     | 0,000     | 0,010  | 0,764  |        | 0,994   | 0,983  | 0,059  | 0,459   | 0,010  | 0,647    | 0,596     | 0,420    | 0,046    | 0,002  |
| LEUCO-A    | correlation coefficient | -0,168 | 0,658      | 0,372    | -0,618 | 0,356     | -0,170    | -0,065 | 0,056  | -0,002 | 1,000   | 0,695  | 0,144  | -0,360  | 0,409  | -0,398   | -0,335    | -0,030   | 0,042    | -0,502 |
|            | significance            | 0,491  | 0,002      | 0,117    | 0,005  | 0,135     | 0,486     | 0,792  | 0,819  | 0,994  |         | 0,001  | 0,557  | 0,130   | 0,082  | 0,091    | 0,161     | 0,904    | 0,864    | 0,029  |
| PMN-A      | correlation coefficient | -0,616 | 0,451      | 0,035    | -0,481 | 0,147     | -0,472    | 0,091  | 0,435  | 0,005  | 0,695   | 1,000  | 0,228  | -0,233  | 0,637  | -0,768   | -0,191    | -0,561   | 0,163    | -0,421 |
|            | significance            | 0,005  | 0,053      | 0,887    | 0,037  | 0,547     | 0,041     | 0,710  | 0,063  | 0,983  | 0,001   |        | 0,348  | 0,336   | 0,003  | 0,000    | 0,433     | 0,012    | 0,505    | 0,073  |
| Plaq-A     | correlation coefficient | -0,088 | -0,305     | -0,154   | 0,323  | -0,098    | -0,526    | -0,102 | 0,233  | 0,440  | 0,144   | 0,228  | 1,000  | 0,058   | -0,146 | -0,435   | 0,340     | -0,393   | -0,835   | 0,081  |
|            | significance            | 0,721  | 0,204      | 0,528    | 0,178  | 0,689     | 0,021     | 0,679  | 0,336  | 0,059  | 0,557   | 0,348  |        | 0,814   | 0,552  | 0,063    | 0,154     | 0,096    | 0,000    | 0,743  |
| QuickA     | correlation coefficient | 0,086  | -0,525     | 0,074    | 0,514  | -0,098    | -0,002    | 0,189  | -0,044 | 0,181  | -0,360  | -0,233 | 0,058  | 1,000   | -0,265 | -0,112   | 0,561     | -0,377   | -0,260   | 0,084  |
|            | significance            | 0,726  | 0,021      | 0,764    | 0,024  | 0,689     | 0,994     | 0,437  | 0,858  | 0,459  | 0,130   | 0,336  | 0,814  |         | 0,273  | 0,647    | 0,012     | 0,111    | 0,283    | 0,732  |
| DD-A       | correlation coefficient | -0,404 | 0,349      | -0,214   | -0,456 | -0,242    | 0,068     | -0,321 | 0,454  | -0,574 | 0,409   | 0,637  | -0,146 | -0,265  | 1,000  | -0,365   | -0,089    | -0,195   | 0,504    | -0,579 |
|            | significance            | 0,087  | 0,143      | 0,379    | 0,050  | 0,318     | 0,781     | 0,180  | 0,051  | 0,010  | 0,082   | 0,003  | 0,552  | 0,273   |        | 0,124    | 0,716     | 0,424    | 0,028    | 0,009  |
| TropUS-A   | correlation coefficient | 0,635  | -0,035     | 0,105    | 0,153  | 0,061     | 0,554     | -0,025 | -0,432 | -0,112 | -0,398  | -0,768 | -0,435 | -0,112  | -0,365 | 1,000    | -0,009    | 0,874    | 0,223    | 0,312  |
|            | significance            | 0,003  | 0,887      | 0,668    | 0,533  | 0,803     | 0,014     | 0,920  | 0,065  | 0,647  | 0,091   | 0,000  | 0,063  | 0,647   | 0,124  |          | 0,972     | 0,000    | 0,359    | 0,193  |
| FuncProtC  | correlation coefficient | 0,205  | -0,574     | -0,346   | 0,775  | -0,528    | 0,198     | -0,247 | 0,012  | -0,130 | -0,335  | -0,191 | 0,340  | 0,561   | -0,089 | -0,009   | 1,000     | -0,242   | -0,316   | -0,170 |
|            | significance            | 0,399  | 0,010      | 0,147    | 0,000  | 0,020     | 0,416     | 0,307  | 0,960  | 0,596  | 0,161   | 0,433  | 0,154  | 0,012   | 0,716  | 0,972    |           | 0,318    | 0,188    | 0,486  |
| APACHEII   | correlation coefficient | 0,632  | 0,156      | 0,175    | -0,125 | 0,089     | 0,596     | -0,168 | -0,386 | -0,196 | -0,030  | -0,561 | -0,393 | -0,377  | -0,195 | 0,874    | -0,242    | 1,000    | 0,193    | 0,081  |
|            | significance            | 0,004  | 0,523      | 0,473    | 0,611  | 0,716     | 0,007     | 0,491  | 0,103  | 0,420  | 0,904   | 0,012  | 0,096  | 0,111   | 0,424  | 0,000    |           | 0,318    | 0,429    | 0,743  |
| PROTOTAL   | correlation coefficient | -0,158 | 0,470      | 0,063    | -0,453 | 0,079     | 0,295     | 0,114  | 0,058  | -0,463 | 0,042   | 0,163  | -0,835 | -0,260  | 0,504  | 0,223    | -0,316    | 0,193    | 1,000    | -0,182 |
|            | significance            | 0,519  | 0,042      | 0,797    | 0,052  | 0,748     | 0,221     | 0,642  | 0,814  | 0,046  | 0,864   | 0,505  | 0,000  | 0,283   | 0,028  | 0,359    | 0,188     | 0,429    |          | 0,455  |
| LAC6H      | correlation coefficient | 0,088  | -0,325     | 0,100    | 0,295  | 0,191     | -0,425    | 0,337  | 0,096  | 0,675  | -0,502  | -0,421 | 0,081  | 0,084   | -0,579 | 0,312    | -0,170    | 0,081    | -0,182   | 1,000  |
|            | significance            | 0,721  | 0,175      | 0,684    | 0,221  | 0,433     | 0,070     | 0,158  | 0,694  | 0,002  | 0,029   | 0,073  | 0,743  | 0,732   | 0,009  | 0,193    | 0,486     | 0,743    | 0,455    |        |



**Supplementary Table S4.** Spearman's correlations in sepsis survivor's group, 2<sup>nd</sup> sample collected.

|            |                         | Age    | CircHist-B | CitrH3-B | PCA-B  | Lactate-B | SOFATot-B | APTT-B | PCR-B  | PCT-B  | LEUCO-B | PMN-B  | Plaq-B | Quick-B | DD-B | TropUS-B | FuncProtC | APACHEII | PROTOTAL | LAC6H  |
|------------|-------------------------|--------|------------|----------|--------|-----------|-----------|--------|--------|--------|---------|--------|--------|---------|------|----------|-----------|----------|----------|--------|
| Age        | correlation coefficient | 1,000  | 0,269      | 0,665    | 0,143  | -0,064    | -0,017    | 1,000  | 0,286  | 0,395  | -0,622  | -0,473 | -0,235 | -0,657  |      | -0,500   | 0,193     | 0,665    | 0,157    | 0,136  |
|            | significance            |        | 0,481      | 0,057    | 0,715  | 0,889     | 0,980     | 0,333  | 0,454  | 0,335  | 0,081   | 0,199  | 0,541  | 0,175   |      | 1,000    | 0,616     | 0,056    | 0,711    | 0,724  |
| CircHist-B | correlation coefficient | 0,269  | 1,000      | 0,504    | -0,350 | -0,114    | 0,000     | 0,500  | 0,200  | -0,333 | 0,167   | 0,025  | 0,167  | -0,543  |      | -1,000   | -0,267    | -0,134   | -0,048   | -0,437 |
|            | significance            | 0,481  |            | 0,170    | 0,359  | 0,789     | 1,000     | 1,000  | 0,613  | 0,428  | 0,678   | 0,957  | 0,678  | 0,297   |      | 0,333    | 0,493     | 0,733    | 0,935    | 0,240  |
| CitrH3-B   | correlation coefficient | 0,665  | 0,504      | 1,000    | 0,445  | -0,039    | 0,313     | 1,000  | -0,084 | 0,323  | -0,244  | 0,072  | -0,462 | -0,486  |      | -1,000   | -0,076    | 0,398    | 0,349    | -0,059 |
|            | significance            | 0,057  | 0,170      |          | 0,230  | 0,938     | 0,419     | 0,333  | 0,834  | 0,432  | 0,524   | 0,855  | 0,212  | 0,356   |      | 0,333    | 0,849     | 0,284    | 0,393    | 0,879  |
| PCA-B      | correlation coefficient | 0,143  | -0,350     | 0,445    | 1,000  | 0,051     | 0,380     | 0,500  | -0,617 | 0,262  | 0,017   | 0,310  | -0,533 | 0,257   |      | 0,500    | 0,383     | 0,269    | 0,167    | -0,050 |
|            | significance            | 0,715  | 0,359      | 0,230    |        | 0,899     | 0,334     | 1,000  | 0,086  | 0,536  | 0,982   | 0,415  | 0,148  | 0,658   |      | 1,000    | 0,313     | 0,482    | 0,703    | 0,902  |
| Lactate-B  | correlation coefficient | -0,064 | -0,114     | -0,039   | 0,051  | 1,000     | 0,098     | 0,866  | -0,342 | 0,185  | 0,038   | -0,166 | 0,419  | -0,224  |      |          | -0,571    | 0,096    | -0,296   | 0,520  |
|            | significance            | 0,889  | 0,789      | 0,938    | 0,899  |           | 0,821     | 0,667  | 0,412  | 0,714  | 0,930   | 0,696  | 0,311  | 1,000   |      |          | 0,149     | 0,811    | 0,531    | 0,198  |
| SOFATot-B  | correlation coefficient | -0,017 | 0,000      | 0,313    | 0,380  | 0,098     | 1,000     | 0,000  | -0,069 | 0,200  | 0,552   | -0,017 | -0,449 | -0,706  |      | 0,500    | -0,242    | 0,470    | 0,701    | -0,418 |
|            | significance            | 0,980  | 1,000      | 0,419    | 0,334  | 0,821     |           | 1,000  | 0,890  | 0,675  | 0,136   | 0,983  | 0,243  | 0,144   |      | 1,000    | 0,556     | 0,211    | 0,073    | 0,271  |
| APTT-B     | correlation coefficient | 1,000  | 0,500      | 1,000    | 0,500  | 0,866     | 0,000     | 1,000  | -0,500 | 1,000  | -0,500  | 1,000  | -0,500 | -0,500  |      |          | 0,500     | 0,500    | 0,500    | 0,500  |
|            | significance            | 0,333  | 1,000      | 0,333    | 1,000  | 0,667     | 1,000     |        | 1,000  | 0,333  | 1,000   | 0,333  | 1,000  | 1,000   |      |          | 1,000     | 1,000    | 1,000    | 1,000  |
| PCR-B      | correlation coefficient | 0,286  | 0,200      | -0,084   | -0,617 | -0,342    | -0,069    | -0,500 | 1,000  | 0,476  | -0,117  | -0,452 | 0,383  | -0,486  |      | 0,500    | -0,350    | 0,479    | -0,190   | 0,109  |
|            | significance            | 0,454  | 0,613      | 0,834    | 0,086  | 0,412     | 0,890     | 1,000  |        | 0,243  | 0,776   | 0,224  | 0,313  | 0,356   |      | 1,000    | 0,359     | 0,195    | 0,665    | 0,782  |
| PCT-B      | correlation coefficient | 0,395  | -0,333     | 0,323    | 0,262  | 0,185     | 0,200     | 1,000  | 0,476  | 1,000  | -0,333  | 0,012  | -0,119 | -0,314  |      | 0,500    | -0,286    | 0,747    | 0,000    | 0,611  |
|            | significance            | 0,335  | 0,428      | 0,432    | 0,536  | 0,714     | 0,675     | 0,333  | 0,243  |        | 0,428   | 0,990  | 0,793  | 0,564   |      | 1,000    | 0,501     | 0,040    | 1,000    | 0,118  |
| LEUCO-B    | correlation coefficient | -0,622 | 0,167      | -0,244   | 0,017  | 0,038     | 0,552     | -0,500 | -0,117 | -0,333 | 1,000   | 0,351  | 0,200  | -0,257  |      | 0,500    | -0,200    | -0,185   | 0,024    | -0,655 |
|            | significance            | 0,081  | 0,678      | 0,524    | 0,982  | 0,930     | 0,136     | 1,000  | 0,776  | 0,428  |         | 0,352  | 0,613  | 0,658   |      | 1,000    | 0,613     | 0,634    | 0,977    | 0,062  |
| PMN-B      | correlation coefficient | -0,473 | 0,025      | 0,072    | 0,310  | -0,166    | -0,017    | 1,000  | -0,452 | 0,012  | 0,351   | 1,000  | -0,134 | 0,290   |      | 0,500    | 0,159     | -0,506   | 0,119    | -0,152 |
|            | significance            | 0,199  | 0,957      | 0,855    | 0,415  | 0,696     | 0,983     | 0,333  | 0,224  | 0,990  | 0,352   |        | 0,731  | 0,600   |      | 1,000    | 0,683     | 0,166    | 0,793    | 0,692  |
| Plaq-B     | correlation coefficient | -0,235 | 0,167      | -0,462   | -0,533 | 0,419     | -0,449    | -0,500 | 0,383  | -0,119 | 0,200   | -0,134 | 1,000  | 0,086   |      | -0,500   | -0,383    | -0,143   | -0,810   | 0,210  |
|            | significance            | 0,541  | 0,678      | 0,212    | 0,148  | 0,311     | 0,243     | 1,000  | 0,313  | 0,793  | 0,613   | 0,731  |        | 0,919   |      | 1,000    | 0,313     | 0,714    | 0,022    | 0,586  |
| Quick-B    | correlation coefficient | -0,657 | -0,543     | -0,486   | 0,257  | -0,224    | -0,706    | -0,500 | -0,486 | -0,314 | -0,257  | 0,290  | 0,086  | 1,000   |      | 0,500    | 0,257     | -0,667   | -0,800   | 0,257  |
|            | significance            | 0,175  | 0,297      | 0,356    | 0,658  | 1,000     | 0,144     | 1,000  | 0,356  | 0,564  | 0,658   | 0,600  | 0,919  |         |      | 1,000    | 0,658     | 0,161    | 0,133    | 0,658  |
| DD-B       | correlation coefficient |        |            |          |        |           |           |        |        |        |         |        |        |         |      |          |           |          |          |        |
|            | significance            |        |            |          |        |           |           |        |        |        |         |        |        |         |      |          |           |          |          |        |
| TropUS-B   | correlation coefficient | -0,500 | -1,000     | -1,000   | 0,500  |           | 0,500     |        | 0,500  | 0,500  | 0,500   | 0,500  | -0,500 | 0,500   |      | 1,000    | 1,000     | 0,500    | 0,500    | -1,000 |
|            | significance            | 1,000  | 0,333      | 0,333    | 1,000  |           | 1,000     |        | 1,000  | 1,000  | 1,000   | 1,000  | 1,000  | 1,000   |      |          | 0,333     | 1,000    | 1,000    | 0,333  |
| FuncProtC  | correlation coefficient | 0,193  | -0,267     | -0,076   | 0,383  | -0,571    | -0,242    | 0,500  | -0,350 | -0,286 | -0,200  | 0,159  | -0,383 | 0,257   |      | 1,000    | 1,000     | -0,101   | 0,190    | -0,328 |
|            | significance            | 0,616  | 0,493      | 0,849    | 0,313  | 0,149     | 0,556     | 1,000  | 0,359  | 0,501  | 0,613   | 0,683  | 0,313  | 0,658   |      | 0,333    |           | 0,800    | 0,665    | 0,386  |
| APACHEII   | correlation coefficient | 0,665  | -0,134     | 0,398    | 0,269  | 0,096     | 0,470     | 0,500  | 0,479  | 0,747  | -0,185  | -0,506 | -0,143 | -0,667  |      | 0,500    | -0,101    | 1,000    | 0,024    | 0,144  |
|            | significance            | 0,056  | 0,733      | 0,284    | 0,482  | 0,811     | 0,211     | 1,000  | 0,195  | 0,040  | 0,634   | 0,166  | 0,714  | 0,161   |      | 1,000    | 0,800     |          | 0,968    | 0,710  |
| PROTOTAL   | correlation coefficient | 0,157  | -0,048     | 0,349    | 0,167  | -0,296    | 0,701     | 0,500  | -0,190 | 0,000  | 0,024   | 0,119  | -0,810 | -0,800  |      | 0,500    | 0,190     | 0,024    | 1,000    | -0,347 |
|            | significance            | 0,711  | 0,935      | 0,393    | 0,703  | 0,531     | 0,073     | 1,000  | 0,665  | 1,000  | 0,977   | 0,793  | 0,022  | 0,133   |      | 1,000    | 0,665     | 0,968    |          | 0,400  |
| LAC6H      | correlation coefficient | 0,136  | -0,437     | -0,059   | -0,050 | 0,520     | -0,418    | 0,500  | 0,109  | 0,611  | -0,655  | -0,152 | 0,210  | 0,257   |      | -1,000   | -0,328    | 0,144    | -0,347   | 1,000  |
|            | significance            | 0,724  | 0,240      | 0,879    | 0,902  | 0,198     | 0,271     | 1,000  | 0,782  | 0,118  | 0,062   | 0,692  | 0,586  | 0,658   |      | 0,333    | 0,386     | 0,710    | 0,400    |        |



**Supplementary Table S5.** Spearman's in sepsis survivor's group, 3rd sample collected.

|            |                         | Age    | CitrH3-C | CitrH3-C | PCA-C  | Lactate-C | SOFA-Tot-C | APTT-C | PCR-C  | PCT-C  | LEUCO-C | PMN-C  | Plaq-C | Quick-C | DD-C | TropUS-C | FuncProtC | APACHEII | PROTOTAL | LAC6H  |
|------------|-------------------------|--------|----------|----------|--------|-----------|------------|--------|--------|--------|---------|--------|--------|---------|------|----------|-----------|----------|----------|--------|
| Age        | correlation coefficient | 1,000  | 0,563    | 0,173    | -0,059 | -0,206    | 0,086      | 0,500  | -0,143 | -0,400 | -0,200  | 0,609  | -0,600 | -0,400  |      |          | 0,193     | 0,665    | 0,157    | 0,136  |
|            | significance            |        | 0,121    | 0,652    | 0,888  | 0,711     | 0,919      | 1,000  | 0,803  | 0,517  | 0,714   | 0,211  | 0,242  | 0,750   |      |          | 0,616     | 0,056    | 0,711    | 0,724  |
| CitrH3-C   | correlation coefficient | 0,563  | 1,000    | 0,418    | -0,017 | 0,029     | 0,771      | -0,500 | -0,086 | 0,200  | 0,029   | -0,029 | -0,257 | -0,800  |      |          | 0,000     | 0,437    | -0,524   | 0,580  |
|            | significance            | 0,121  |          | 0,262    | 0,982  | 0,978     | 0,103      | 1,000  | 0,919  | 0,783  | 1,000   | 0,983  | 0,658  | 0,333   |      |          | 1,000     | 0,241    | 0,197    | 0,108  |
| CitrH3-C   | correlation coefficient | 0,173  | 0,418    | 1,000    | -0,259 | 0,324     | 0,486      | -0,500 | -0,143 | 0,200  | -0,143  | 0,232  | -0,543 | -0,800  |      |          | -0,184    | 0,030    | 0,192    | 0,283  |
|            | significance            | 0,652  | 0,262    |          | 0,497  | 0,556     | 0,356      | 1,000  | 0,803  | 0,783  | 0,803   | 0,650  | 0,297  | 0,333   |      |          | 0,633     | 0,943    | 0,647    | 0,453  |
| PCA-C      | correlation coefficient | -0,059 | -0,017   | -0,259   | 1,000  | 0,029     | 0,657      | 1,000  | -0,714 | -0,700 | -0,543  | 0,029  | -0,371 | 0,400   |      |          | 0,667     | 0,067    | 0,000    | -0,412 |
|            | significance            | 0,888  | 0,982    | 0,497    |        | 0,978     | 0,175      | 0,333  | 0,136  | 0,233  | 0,297   | 0,983  | 0,497  | 0,750   |      |          | 0,059     | 0,868    | 1,000    | 0,271  |
| Lactate-C  | correlation coefficient | -0,206 | 0,029    | 0,324    | 0,029  | 1,000     | 0,029      | -0,500 | -0,647 | 0,000  | -0,618  | -0,015 | -0,500 | -0,316  |      |          | 0,618     | -0,851   | 0,462    | -0,015 |
|            | significance            | 0,711  | 0,978    | 0,556    | 0,978  |           | 0,978      | 1,000  | 0,178  | 1,000  | 0,200   | 0,967  | 0,300  | 1,000   |      |          | 0,200     | 0,044    | 0,433    | 0,967  |
| SOFA-Tot-C | correlation coefficient | 0,086  | 0,771    | 0,486    | 0,657  | 0,029     | 1,000      | 0,500  | -0,543 | -0,600 | -0,200  | -0,145 | -0,371 | -0,400  |      |          | 0,200     | 0,464    | -0,100   | -0,029 |
|            | significance            | 0,919  | 0,103    | 0,356    | 0,175  | 0,978     |            | 1,000  | 0,297  | 0,350  | 0,714   | 0,778  | 0,497  | 0,750   |      |          | 0,714     | 0,372    | 0,950    | 0,983  |
| APTT-C     | correlation coefficient | 0,500  | -0,500   | -0,500   | 1,000  | -0,500    | 0,500      | 1,000  | -0,500 | -0,500 | -0,500  | 1,000  | -0,500 | 1,000   |      |          | 0,500     | 0,866    | 0,500    | -0,500 |
|            | significance            | 1,000  | 1,000    | 1,000    | 0,333  | 1,000     | 1,000      |        | 1,000  | 1,000  | 1,000   | 0,333  | 1,000  | 0,333   |      |          | 1,000     | 0,667    | 1,000    | 1,000  |
| PCR-C      | correlation coefficient | -0,143 | -0,086   | -0,143   | -0,714 | -0,647    | -0,543     | -0,500 | 1,000  | 0,700  | 0,714   | 0,029  | 0,657  | 0,400   |      |          | -0,714    | 0,261    | -0,600   | 0,348  |
|            | significance            | 0,803  | 0,919    | 0,803    | 0,136  | 0,178     | 0,297      | 1,000  |        | 0,233  | 0,136   | 0,983  | 0,175  | 0,750   |      |          | 0,136     | 0,617    | 0,350    | 0,494  |
| PCT-C      | correlation coefficient | -0,400 | 0,200    | 0,200    | -0,700 | 0,000     | -0,600     | -0,500 | 0,700  | 1,000  | 0,200   | 0,300  | 0,300  | 0,400   |      |          | -0,200    | -0,359   | -1,000   | 0,700  |
|            | significance            | 0,517  | 0,783    | 0,783    | 0,233  | 1,000     | 0,350      | 1,000  | 0,233  |        | 0,783   | 0,683  | 0,683  | 0,750   |      |          | 0,783     | 0,633    | 0,083    | 0,233  |
| LEUCO-C    | correlation coefficient | -0,200 | 0,029    | -0,143   | -0,543 | -0,618    | -0,200     | -0,500 | 0,714  | 0,200  | 1,000   | -0,580 | 0,829  | -0,200  |      |          | -1,000    | 0,377    | -0,500   | 0,232  |
|            | significance            | 0,714  | 1,000    | 0,803    | 0,297  | 0,200     | 0,714      | 1,000  | 0,136  | 0,783  |         | 0,244  | 0,058  | 0,917   |      |          | 0,003     | 0,472    | 0,450    | 0,650  |
| PMN-C      | correlation coefficient | 0,609  | -0,029   | 0,232    | 0,029  | -0,015    | -0,145     | 1,000  | 0,029  | 0,300  | -0,580  | 1,000  | -0,667 | 0,400   |      |          | 0,580     | 0,074    | 0,154    | -0,397 |
|            | significance            | 0,211  | 0,983    | 0,650    | 0,983  | 0,967     | 0,778      | 0,333  | 0,983  | 0,683  | 0,244   |        | 0,161  | 0,750   |      |          | 0,244     | 0,886    | 0,833    | 0,428  |
| Plaq-C     | correlation coefficient | -0,600 | -0,257   | -0,543   | -0,371 | -0,500    | -0,371     | -0,500 | 0,657  | 0,300  | 0,829   | -0,667 | 1,000  | 0,400   |      |          | -0,829    | 0,116    | -0,500   | 0,580  |
|            | significance            | 0,242  | 0,658    | 0,297    | 0,497  | 0,300     | 0,497      | 1,000  | 0,175  | 0,683  | 0,058   | 0,161  |        | 0,750   |      |          | 0,058     | 0,839    | 0,450    | 0,244  |
| Quick-C    | correlation coefficient | -0,400 | -0,800   | -0,800   | 0,400  | -0,316    | -0,400     | 1,000  | 0,400  | 0,400  | -0,200  | 0,400  | 0,400  | 1,000   |      |          | 0,200     | -0,316   | 0,500    | 0,400  |
|            | significance            | 0,750  | 0,333    | 0,333    | 0,750  | 1,000     | 0,750      | 0,333  | 0,750  | 0,750  | 0,917   | 0,750  | 0,750  |         |      |          | 0,917     | 1,000    | 1,000    | 0,750  |
| DD-C       | correlation coefficient |        |          |          |        |           |            |        |        |        |         |        |        |         |      |          |           |          |          |        |
|            | significance            |        |          |          |        |           |            |        |        |        |         |        |        |         |      |          |           |          |          |        |
| TropUS-C   | correlation coefficient |        |          |          |        |           |            |        |        |        |         |        |        |         |      |          |           |          |          |        |
|            | significance            |        |          |          |        |           |            |        |        |        |         |        |        |         |      |          |           |          |          |        |
| FuncProtC  | correlation coefficient | 0,193  | 0,000    | -0,184   | 0,667  | 0,618     | 0,200      | 0,500  | -0,714 | -0,200 | -1,000  | 0,580  | -0,829 | 0,200   |      |          | 1,000     | -0,101   | 0,190    | -0,328 |
|            | significance            | 0,616  | 1,000    | 0,633    | 0,059  | 0,200     | 0,714      | 1,000  | 0,136  | 0,783  | 0,003   | 0,244  | 0,058  | 0,917   |      |          |           | 0,800    | 0,665    | 0,386  |
| APACHEII   | correlation coefficient | 0,665  | 0,437    | 0,030    | 0,067  | -0,851    | 0,464      | 0,866  | 0,261  | -0,359 | 0,377   | 0,074  | 0,116  | -0,316  |      |          | -0,101    | 1,000    | 0,024    | 0,144  |
|            | significance            | 0,056  | 0,241    | 0,943    | 0,868  | 0,044     | 0,372      | 0,667  | 0,633  | 0,472  | 0,886   | 0,839  | 1,000  |         |      |          | 0,800     |          | 0,968    | 0,710  |
| PROTOTAL   | correlation coefficient | 0,157  | -0,524   | 0,192    | 0,000  | 0,462     | -0,100     | 0,500  | -0,600 | -1,000 | -0,500  | 0,154  | -0,500 | 0,500   |      |          | 0,190     | 0,024    | 1,000    | -0,347 |
|            | significance            | 0,711  | 0,197    | 0,647    | 1,000  | 0,433     | 0,950      | 1,000  | 0,350  | 0,083  | 0,450   | 0,833  | 0,450  | 1,000   |      |          | 0,665     | 0,968    |          | 0,400  |
| LAC6H      | correlation coefficient | 0,136  | 0,580    | 0,283    | -0,412 | -0,015    | -0,029     | -0,500 | 0,348  | 0,700  | 0,232   | -0,397 | 0,580  | 0,400   |      |          | -0,328    | 0,144    | -0,347   | 1,000  |
|            | significance            | 0,724  | 0,108    | 0,453    | 0,271  | 0,967     | 0,983      | 1,000  | 0,494  | 0,233  | 0,650   | 0,428  | 0,244  | 0,750   |      |          | 0,386     | 0,710    | 0,400    |        |



**Supplementary Table S6.** Spearman's correlations in SS survivor's group, 1<sup>st</sup> sample collected.

|           |                         | Age    | CitrH3-A | CitrH3-A | PCA-A  | Lactate-A | SOFATot-A | APTT-A | PCR-A  | PCT-A  | LEUCO-A | PMN-A  | Plaq-A | Quick-A | DD-A   | TropUS-A | FuncProtC | APACHEII | PROTOTAL | LAC6H  |
|-----------|-------------------------|--------|----------|----------|--------|-----------|-----------|--------|--------|--------|---------|--------|--------|---------|--------|----------|-----------|----------|----------|--------|
| Age       | correlation coefficient | 1,000  | 0,133    | -0,133   | -0,025 | -0,646    | 0,191     | -0,275 | -0,249 | 0,456  | 0,246   | 0,693  | 0,114  | -0,072  | 0,379  | -0,144   | -0,163    | 0,651    | 0,505    | -0,604 |
|           | significance            |        | 0,586    | 0,586    | 0,920  | 0,003     | 0,433     | 0,254  | 0,304  | 0,050  | 0,311   | 0,001  | 0,642  | 0,770   | 0,110  | 0,557    | 0,505     | 0,003    | 0,027    | 0,006  |
| CitrH3-A  | correlation coefficient | 0,133  | 1,000    | -0,205   | -0,632 | -0,465    | 0,456     | 0,600  | -0,505 | -0,256 | -0,153  | 0,107  | -0,561 | -0,777  | 0,661  | 0,716    | -0,726    | 0,047    | 0,498    | 0,037  |
|           | significance            | 0,586  |          | 0,399    | 0,004  | 0,045     | 0,050     | 0,007  | 0,027  | 0,290  | 0,533   | 0,663  | 0,012  | 0,000   | 0,002  | 0,001    | 0,000     | 0,847    | 0,030    | 0,881  |
| CitrH3-A  | correlation coefficient | -0,133 | -0,205   | 1,000    | 0,370  | 0,486     | 0,156     | -0,258 | -0,016 | -0,302 | 0,339   | -0,016 | 0,453  | 0,095   | -0,312 | -0,354   | 0,446     | 0,309    | -0,151   | 0,172  |
|           | significance            | 0,586  | 0,399    |          | 0,119  | 0,035     | 0,523     | 0,286  | 0,949  | 0,209  | 0,156   | 0,949  | 0,052  | 0,700   | 0,193  | 0,137    | 0,056     | 0,198    | 0,538    | 0,482  |
| PCA-A     | correlation coefficient | -0,025 | -0,632   | 0,370    | 1,000  | 0,400     | -0,679    | -0,651 | 0,567  | 0,419  | 0,667   | 0,091  | 0,933  | 0,861   | -0,702 | -0,677   | 0,951     | -0,114   | -0,267   | 0,168  |
|           | significance            | 0,920  | 0,004    | 0,119    |        | 0,090     | 0,001     | 0,003  | 0,011  | 0,074  | 0,002   | 0,710  | 0,000  | 0,000   | 0,001  | 0,001    | 0,000     | 0,642    | 0,270    | 0,491  |
| Lactate-A | correlation coefficient | -0,646 | -0,465   | 0,486    | 0,400  | 1,000     | -0,072    | -0,089 | 0,565  | -0,242 | -0,077  | -0,284 | 0,282  | 0,451   | -0,505 | -0,156   | 0,465     | -0,325   | -0,516   | 0,574  |
|           | significance            | 0,003  | 0,045    | 0,035    | 0,090  |           | 0,770     | 0,716  | 0,012  | 0,318  | 0,753   | 0,238  | 0,241  | 0,053   | 0,027  | 0,523    | 0,045     | 0,175    | 0,024    | 0,010  |
| SOFATot-A | correlation coefficient | 0,191  | 0,456    | 0,156    | -0,679 | -0,072    | 1,000     | 0,270  | -0,518 | -0,477 | -0,532  | 0,305  | -0,605 | -0,700  | 0,642  | 0,442    | -0,656    | 0,561    | 0,468    | -0,240 |
|           | significance            | 0,433  | 0,050    | 0,523    | 0,001  | 0,770     |           | 0,263  | 0,023  | 0,039  | 0,019   | 0,204  | 0,006  | 0,001   | 0,003  | 0,058    | 0,002     | 0,012    | 0,043    | 0,322  |
| APTT-A    | correlation coefficient | -0,275 | 0,600    | -0,258   | -0,651 | -0,089    | 0,270     | 1,000  | -0,205 | -0,251 | -0,351  | -0,363 | -0,714 | -0,602  | 0,365  | 0,828    | -0,609    | -0,446   | -0,046   | 0,525  |
|           | significance            | 0,254  | 0,007    | 0,286    | 0,003  | 0,716     | 0,263     |        | 0,399  | 0,300  | 0,141   | 0,126  | 0,001  | 0,006   | 0,124  | 0,000    | 0,006     | 0,056    | 0,853    | 0,021  |
| PCR-A     | correlation coefficient | -0,249 | -0,505   | -0,016   | 0,567  | 0,565     | -0,518    | -0,205 | 1,000  | 0,335  | 0,056   | 0,014  | 0,402  | 0,818   | -0,605 | -0,263   | 0,479     | -0,442   | -0,574   | 0,465  |
|           | significance            | 0,304  | 0,027    | 0,949    | 0,011  | 0,012     | 0,023     | 0,399  |        | 0,161  | 0,819   | 0,955  | 0,088  | 0,000   | 0,006  | 0,276    | 0,038     | 0,058    | 0,010    | 0,045  |
| PCT-A     | correlation coefficient | 0,456  | -0,256   | -0,302   | 0,419  | -0,242    | -0,477    | -0,251 | 0,335  | 1,000  | 0,453   | 0,365  | 0,428  | 0,482   | -0,049 | -0,202   | 0,328     | -0,123   | 0,012    | -0,130 |
|           | significance            | 0,050  | 0,290    | 0,209    | 0,074  | 0,318     | 0,039     | 0,300  | 0,161  |        | 0,052   | 0,124  | 0,067  | 0,036   | 0,842  | 0,408    | 0,170     | 0,616    | 0,960    | 0,596  |
| LEUCO-A   | correlation coefficient | 0,246  | -0,153   | 0,339    | 0,667  | -0,077    | -0,532    | -0,351 | 0,056  | 0,453  | 1,000   | 0,072  | 0,767  | 0,370   | -0,216 | -0,435   | 0,656     | -0,016   | 0,019    | 0,025  |
|           | significance            | 0,311  | 0,533    | 0,156    | 0,002  | 0,753     | 0,019     | 0,141  | 0,819  | 0,052  |         | 0,770  | 0,000  | 0,119   | 0,375  | 0,063    | 0,002     | 0,949    | 0,937    | 0,920  |
| PMN-A     | correlation coefficient | 0,693  | 0,107    | -0,016   | 0,091  | -0,284    | 0,305     | -0,363 | 0,014  | 0,365  | 0,072   | 1,000  | 0,079  | 0,039   | 0,270  | -0,011   | -0,058    | 0,612    | 0,491    | -0,516 |
|           | significance            | 0,001  | 0,663    | 0,949    | 0,710  | 0,238     | 0,204     | 0,126  | 0,955  | 0,124  | 0,770   |        | 0,748  | 0,875   | 0,263  | 0,966    | 0,814     | 0,005    | 0,033    | 0,024  |
| Plaq-A    | correlation coefficient | 0,114  | -0,561   | 0,453    | 0,933  | 0,282     | -0,605    | -0,714 | 0,402  | 0,428  | 0,767   | 0,079  | 1,000  | 0,765   | -0,602 | -0,777   | 0,896     | 0,046    | -0,244   | 0,042  |
|           | significance            | 0,642  | 0,012    | 0,052    | 0,000  | 0,241     | 0,006     | 0,001  | 0,088  | 0,067  | 0,000   | 0,748  |        | 0,000   | 0,006  | 0,000    | 0,000     | 0,853    | 0,314    | 0,864  |
| QuickA    | correlation coefficient | -0,072 | -0,777   | 0,095    | 0,861  | 0,451     | -0,700    | -0,602 | 0,818  | 0,482  | 0,370   | 0,039  | 0,765  | 1,000   | -0,746 | -0,658   | 0,804     | -0,219   | -0,484   | 0,198  |
|           | significance            | 0,770  | 0,000    | 0,700    | 0,000  | 0,053     | 0,001     | 0,006  | 0,000  | 0,036  | 0,119   | 0,875  | 0,000  |         | 0,000  | 0,002    | 0,000     | 0,367    | 0,036    | 0,416  |
| DD-A      | correlation coefficient | 0,379  | 0,661    | -0,312   | -0,702 | -0,505    | 0,642     | 0,365  | -0,605 | -0,049 | -0,216  | 0,270  | -0,602 | -0,746  | 1,000  | 0,612    | -0,756    | 0,279    | 0,714    | -0,388 |
|           | significance            | 0,110  | 0,002    | 0,193    | 0,001  | 0,027     | 0,003     | 0,124  | 0,006  | 0,842  | 0,375   | 0,263  | 0,006  | 0,000   |        | 0,005    | 0,000     | 0,247    | 0,001    | 0,101  |
| TropUS-A  | correlation coefficient | -0,144 | 0,716    | -0,354   | -0,677 | -0,156    | 0,442     | 0,828  | -0,263 | -0,202 | -0,435  | -0,011 | -0,777 | -0,658  | 0,612  | 1,000    | -0,723    | -0,261   | 0,298    | 0,274  |
|           | significance            | 0,557  | 0,001    | 0,137    | 0,001  | 0,523     | 0,058     | 0,000  | 0,276  | 0,408  | 0,063   | 0,966  | 0,000  | 0,002   | 0,005  |          | 0,000     | 0,280    | 0,215    | 0,257  |
| FuncProtC | correlation coefficient | -0,163 | -0,726   | 0,446    | 0,951  | 0,465     | -0,656    | -0,609 | 0,479  | 0,328  | 0,656   | -0,058 | 0,896  | 0,804   | -0,756 | -0,723   | 1,000     | -0,146   | -0,368   | 0,177  |
|           | significance            | 0,505  | 0,000    | 0,056    | 0,000  | 0,045     | 0,002     | 0,006  | 0,038  | 0,170  | 0,002   | 0,814  | 0,000  | 0,000   | 0,000  |          |           | 0,552    | 0,121    | 0,468  |
| APACHEII  | correlation coefficient | 0,651  | 0,047    | 0,309    | -0,114 | -0,325    | 0,561     | -0,446 | -0,442 | -0,123 | -0,016  | 0,612  | 0,046  | -0,219  | 0,279  | -0,261   | -0,146    | 1,000    | 0,477    | -0,635 |
|           | significance            | 0,003  | 0,847    | 0,198    | 0,642  | 0,175     | 0,012     | 0,056  | 0,058  | 0,616  | 0,949   | 0,005  | 0,853  | 0,367   | 0,247  | 0,280    | 0,552     |          | 0,039    | 0,003  |
| PROTOTAL  | correlation coefficient | 0,505  | 0,498    | -0,151   | -0,267 | -0,516    | 0,468     | -0,046 | -0,574 | 0,012  | 0,019   | 0,491  | -0,244 | -0,484  | 0,714  | 0,298    | -0,368    | 0,477    | 1,000    | -0,495 |
|           | significance            | 0,027  | 0,030    | 0,538    | 0,270  | 0,024     | 0,043     | 0,853  | 0,010  | 0,960  | 0,937   | 0,033  | 0,314  | 0,036   | 0,001  | 0,215    | 0,121     | 0,039    |          | 0,031  |
| LAC6H     | correlation coefficient | -0,604 | 0,037    | 0,172    | 0,168  | 0,574     | -0,240    | 0,525  | 0,465  | -0,130 | 0,025   | -0,516 | 0,042  | 0,198   | -0,388 | 0,274    | 0,177     | -0,635   | -0,495   | 1,000  |
|           | significance            | 0,006  | 0,881    | 0,482    | 0,491  | 0,010     | 0,322     | 0,021  | 0,045  | 0,596  | 0,920   | 0,024  | 0,864  | 0,416   | 0,101  | 0,257    | 0,468     | 0,003    | 0,031    |        |



**Supplementary Table S7.** Spearman's correlations in SS survivor's group, 2<sup>nd</sup> sample collected.

|            |                         | Age    | CircHist-B | CitrH3-B | PCA-B  | Lactate-B | SOFATot-B | APTT-B | PCR-B  | PCT-B  | LEUCO-B | PMN-B  | Plaq-B | Quick-B | DD-B   | TropUS-B | FuncProtC | APACHEII | PROTOTAL | LAC6H  |
|------------|-------------------------|--------|------------|----------|--------|-----------|-----------|--------|--------|--------|---------|--------|--------|---------|--------|----------|-----------|----------|----------|--------|
| Age        | correlation coefficient | 1,000  | -0,410     | -0,277   | -0,203 | -0,291    | -0,198    | -0,588 | -0,037 | -0,166 | 0,161   | 0,410  | -0,147 | 0,503   | 0,500  | -0,205   | 0,102     | 0,527    | 0,167    | 0,058  |
|            | significance            |        | 0,210      | 0,408    | 0,548  | 0,409     | 0,579     | 0,233  | 0,918  | 0,621  | 0,634   | 0,209  | 0,665  | 0,116   | 1,000  | 0,767    | 0,764     | 0,098    | 0,620    | 0,874  |
| CircHist-B | correlation coefficient | -0,410 | 1,000      | 0,464    | -0,091 | 0,347     | 0,459     | -0,771 | 0,318  | 0,137  | -0,382  | 0,023  | -0,055 | -0,296  | -0,500 | 0,900    | -0,556    | -0,560   | -0,247   | -0,340 |
|            | significance            | 0,210  |            | 0,155    | 0,796  | 0,324     | 0,183     | 0,103  | 0,342  | 0,687  | 0,248   | 0,951  | 0,881  | 0,374   | 1,000  | 0,083    | 0,079     | 0,077    | 0,462    | 0,334  |
| CitrH3-B   | correlation coefficient | -0,277 | 0,464      | 1,000    | 0,564  | -0,097    | 0,563     | -0,657 | 0,355  | 0,374  | -0,273  | 0,239  | -0,100 | 0,246   | -0,500 | 0,600    | -0,114    | -0,155   | -0,511   | 0,201  |
|            | significance            | 0,408  | 0,155      |          | 0,076  | 0,792     | 0,095     | 0,175  | 0,286  | 0,256  | 0,418   | 0,475  | 0,776  | 0,462   | 1,000  | 0,350    | 0,739     | 0,647    | 0,111    | 0,576  |
| PCA-B      | correlation coefficient | -0,203 | -0,091     | 0,564    | 1,000  | -0,395    | -0,092    | 0,086  | -0,027 | 0,487  | -0,227  | 0,152  | 0,155  | 0,528   | -0,500 | -0,900   | 0,606     | 0,214    | -0,338   | 0,347  |
|            | significance            | 0,548  | 0,796      | 0,076    |        | 0,257     | 0,802     | 0,919  | 0,946  | 0,131  | 0,503   | 0,655  | 0,654  | 0,098   | 1,000  | 0,083    | 0,052     | 0,525    | 0,307    | 0,324  |
| Lactate-B  | correlation coefficient | -0,291 | 0,347      | -0,097   | -0,395 | 1,000     | 0,650     | 0,543  | 0,450  | -0,165 | 0,158   | 0,157  | -0,328 | -0,787  | 1,000  | 0,600    | -0,571    | -0,177   | 0,532    | -0,251 |
|            | significance            | 0,409  | 0,324      | 0,792    | 0,257  |           | 0,065     | 0,297  | 0,194  | 0,646  | 0,663   | 0,660  | 0,353  | 0,009   | 0,333  | 0,350    | 0,089     | 0,622    | 0,116    | 0,512  |
| SOFATot-B  | correlation coefficient | -0,198 | 0,459      | 0,563    | -0,092 | 0,650     | 1,000     | 0,316  | 0,404  | -0,242 | -0,220  | 0,180  | -0,361 | -0,365  | 1,000  | 0,872    | -0,740    | -0,074   | 0,040    | -0,110 |
|            | significance            | 0,579  | 0,183      | 0,095    | 0,802  | 0,065     |           | 0,600  | 0,247  | 0,494  | 0,538   | 0,619  | 0,303  | 0,295   | 0,333  | 0,100    | 0,018     | 0,839    | 0,914    | 0,759  |
| APTT-B     | correlation coefficient | -0,588 | -0,771     | -0,657   | 0,086  | 0,543     | 0,316     | 1,000  | -0,371 | -0,377 | 0,086   | -0,143 | -0,257 | -0,600  | 1,000  | -0,400   | 0,029     | 0,522    | 0,771    | -0,100 |
|            | significance            | 0,233  | 0,103      | 0,175    | 0,919  | 0,297     | 0,600     |        | 0,497  | 0,472  | 0,919   | 0,803  | 0,658  | 0,242   | 0,333  | 0,750    | 1,000     | 0,300    | 0,103    | 0,950  |
| PCR-B      | correlation coefficient | -0,037 | 0,318      | 0,355    | -0,027 | 0,450     | 0,404     | -0,371 | 1,000  | 0,433  | 0,209   | 0,547  | 0,118  | 0,050   | 0,500  | 0,900    | -0,005    | -0,068   | -0,242   | 0,213  |
|            | significance            | 0,918  | 0,342      | 0,286    | 0,946  | 0,194     | 0,247     | 0,497  |        | 0,184  | 0,539   | 0,086  | 0,735  | 0,887   | 1,000  | 0,083    | 0,995     | 0,844    | 0,470    | 0,552  |
| PCT-B      | correlation coefficient | -0,166 | 0,137      | 0,374    | 0,487  | -0,165    | -0,242    | -0,377 | 0,433  | 1,000  | 0,027   | -0,088 | 0,569  | 0,311   | -0,500 | 0,051    | 0,475     | -0,164   | -0,451   | 0,381  |
|            | significance            | 0,621  | 0,687      | 0,256    | 0,131  | 0,646     | 0,494     | 0,472  | 0,184  |        | 0,940   | 0,797  | 0,071  | 0,349   | 1,000  | 1,000    | 0,141     | 0,626    | 0,164    | 0,274  |
| LEUCO-B    | correlation coefficient | 0,161  | -0,382     | -0,273   | -0,227 | 0,158     | -0,220    | 0,086  | 0,209  | 0,027  | 1,000   | 0,248  | -0,055 | -0,032  | 1,000  | 0,300    | 0,287     | -0,169   | 0,005    | 0,766  |
|            | significance            | 0,634  | 0,248      | 0,418    | 0,503  | 0,663     | 0,538     | 0,919  | 0,539  | 0,940  |         | 0,459  | 0,881  | 0,930   | 0,333  | 0,683    | 0,390     | 0,619    | 0,994    | 0,013  |
| PMN-B      | correlation coefficient | 0,410  | 0,023      | 0,239    | 0,152  | 0,157     | 0,180     | -0,143 | 0,547  | -0,088 | 0,248   | 1,000  | -0,336 | 0,270   | 1,000  | -0,200   | 0,154     | 0,350    | 0,134    | 0,160  |
|            | significance            | 0,209  | 0,951      | 0,475    | 0,655  | 0,660     | 0,619     | 0,803  | 0,086  | 0,797  | 0,459   |        | 0,311  | 0,417   | 0,333  | 0,783    | 0,646     | 0,288    | 0,691    | 0,658  |
| Plaq-B     | correlation coefficient | -0,147 | -0,055     | -0,100   | 0,155  | -0,328    | -0,361    | -0,257 | 0,118  | 0,569  | -0,055  | -0,336 | 1,000  | 0,364   | -1,000 | 0,000    | 0,446     | -0,415   | -0,452   | -0,012 |
|            | significance            | 0,665  | 0,881      | 0,776    | 0,654  | 0,353     | 0,303     | 0,658  | 0,735  | 0,071  | 0,881   | 0,311  |        | 0,268   | 0,333  | 1,000    | 0,169     | 0,205    | 0,164    | 0,980  |
| Quick-B    | correlation coefficient | 0,503  | -0,296     | 0,246    | 0,528  | -0,787    | -0,365    | -0,600 | 0,050  | 0,311  | -0,032  | 0,270  | 0,364  | 1,000   | -0,500 | -0,800   | 0,580     | 0,233    | -0,597   | 0,442  |
|            | significance            | 0,116  | 0,374      | 0,462    | 0,098  | 0,009     | 0,295     | 0,242  | 0,887  | 0,349  | 0,930   | 0,417  | 0,268  |         | 1,000  | 0,133    | 0,065     | 0,486    | 0,056    | 0,199  |
| DD-B       | correlation coefficient | 0,500  | -0,500     | -0,500   | -0,500 | 1,000     | 1,000     | 1,000  | 0,500  | -0,500 | 1,000   | 1,000  | -1,000 | -0,500  | 1,000  |          | -0,500    | 0,500    | 1,000    | -0,500 |
|            | significance            | 1,000  | 1,000      | 1,000    | 1,000  | 0,333     | 0,333     | 0,333  | 1,000  | 1,000  | 0,333   | 0,333  | 0,333  | 1,000   |        |          | 1,000     | 1,000    | 0,333    | 1,000  |
| TropUS-B   | correlation coefficient | -0,205 | 0,900      | 0,600    | -0,900 | 0,600     | 0,872     | -0,400 | 0,900  | 0,051  | 0,300   | -0,200 | 0,000  | -0,800  |        | 1,000    | -1,000    | -0,900   | -0,200   | 0,000  |
|            | significance            | 0,767  | 0,083      | 0,350    | 0,083  | 0,350     | 0,100     | 0,750  | 0,083  | 1,000  | 0,683   | 0,783  | 1,000  | 0,133   |        |          | 0,017     | 0,083    | 0,783    | 1,000  |
| FuncProtC  | correlation coefficient | 0,102  | -0,556     | -0,114   | 0,606  | -0,571    | -0,740    | 0,029  | -0,005 | 0,475  | 0,287   | 0,154  | 0,446  | 0,580   | -0,500 | -1,000   | 1,000     | 0,260    | -0,201   | 0,432  |
|            | significance            | 0,764  | 0,079      | 0,739    | 0,052  | 0,089     | 0,018     | 1,000  | 0,995  | 0,141  | 0,390   | 0,646  | 0,169  | 0,065   | 1,000  | 0,017    |           | 0,435    | 0,548    | 0,213  |
| APACHEII   | correlation coefficient | 0,527  | -0,560     | -0,155   | 0,214  | -0,177    | -0,074    | 0,522  | -0,068 | -0,164 | -0,169  | 0,350  | -0,415 | 0,233   | 0,500  | -0,900   | 0,260     | 1,000    | 0,451    | -0,085 |
|            | significance            | 0,098  | 0,077      | 0,647    | 0,525  | 0,622     | 0,839     | 0,300  | 0,844  | 0,626  | 0,619   | 0,288  | 0,205  | 0,486   | 1,000  | 0,083    | 0,435     |          | 0,164    | 0,815  |
| PROTOTAL   | correlation coefficient | 0,167  | -0,247     | -0,511   | -0,338 | 0,532     | 0,040     | 0,771  | -0,242 | -0,451 | 0,005   | 0,134  | -0,452 | -0,597  | 1,000  | -0,200   | -0,201    | 0,451    | 1,000    | -0,541 |
|            | significance            | 0,620  | 0,462      | 0,111    | 0,307  | 0,116     | 0,914     | 0,103  | 0,470  | 0,164  | 0,994   | 0,691  | 0,164  | 0,056   | 0,333  | 0,783    | 0,548     | 0,164    |          | 0,109  |
| LAC6H      | correlation coefficient | 0,058  | -0,340     | 0,201    | 0,347  | -0,251    | -0,110    | -0,100 | 0,213  | 0,381  | 0,766   | 0,160  | -0,012 | 0,442   | -0,500 | 0,000    | 0,432     | -0,085   | -0,541   | 1,000  |
|            | significance            | 0,874  | 0,334      | 0,576    | 0,324  | 0,512     | 0,759     | 0,950  | 0,552  | 0,274  | 0,013   | 0,658  | 0,980  | 0,199   | 1,000  | 1,000    | 0,213     | 0,815    | 0,109    |        |



**Supplementary Table S8.** Spearman's correlations in SS survivor's group, 3<sup>rd</sup> sample collected.

|            |                         | Age    | CircHist-C | CitrH3-C | PCA-C  | Lactate-C | SOFATot-C | APTT-C | PCR-C  | PCT-C  | LEUCO-C | PMN-C  | Plaq-C | Quick-C | DD-C   | TropUS-C | FuncProtC | APACHEII | PROTOTAL | LAC6H  |
|------------|-------------------------|--------|------------|----------|--------|-----------|-----------|--------|--------|--------|---------|--------|--------|---------|--------|----------|-----------|----------|----------|--------|
| Age        | correlation coefficient | 1,000  | 0,092      | -0,194   | -0,309 | -0,513    | -0,664    | -0,791 | 0,198  | -0,179 | -0,049  | -0,031 | 0,463  | -0,180  | 0,000  | 0,500    | 0,102     | 0,527    | 0,167    | 0,058  |
|            | significance            |        | 0,789      | 0,563    | 0,353  | 0,159     | 0,056     | 0,133  | 0,582  | 0,619  | 0,897   | 0,938  | 0,180  | 0,635   | 1,000  | 0,450    | 0,764     | 0,098    | 0,620    | 0,874  |
| CircHist-C | correlation coefficient | 0,092  | 1,000      | -0,073   | 0,282  | 0,234     | 0,555     | -0,400 | 0,745  | 0,624  | 0,758   | 0,539  | 0,236  | 0,335   | 0,000  | -0,700   | -0,009    | 0,205    | -0,352   | 0,450  |
|            | significance            | 0,789  |            | 0,833    | 0,402  | 0,540     | 0,126     | 0,517  | 0,017  | 0,060  | 0,015   | 0,114  | 0,513  | 0,375   | 1,000  | 0,233    | 0,983     | 0,543    | 0,287    | 0,194  |
| CitrH3-C   | correlation coefficient | -0,194 | -0,073     | 1,000    | 0,128  | -0,471    | -0,262    | -0,051 | 0,389  | 0,182  | -0,225  | -0,486 | 0,419  | -0,109  | -1,000 | -0,300   | 0,292     | -0,486   | -0,611   | 0,122  |
|            | significance            | 0,563  | 0,833      |          | 0,708  | 0,202     | 0,489     | 1,000  | 0,266  | 0,614  | 0,529   | 0,157  | 0,227  | 0,780   | 0,083  | 0,683    | 0,379     | 0,130    | 0,049    | 0,736  |
| PCA-C      | correlation coefficient | -0,309 | 0,282      | 0,128    | 1,000  | -0,176    | 0,143     | -0,300 | 0,164  | 0,115  | 0,467   | 0,115  | 0,273  | 0,628   | -0,600 | -1,000   | 0,574     | 0,055    | -0,397   | 0,790  |
|            | significance            | 0,353  | 0,402      | 0,708    |        | 0,653     | 0,713     | 0,683  | 0,657  | 0,759  | 0,179   | 0,759  | 0,448  | 0,077   | 0,417  | 0,017    | 0,069     | 0,875    | 0,226    | 0,009  |
| Lactate-C  | correlation coefficient | -0,513 | 0,234      | -0,471   | -0,176 | 1,000     | 0,741     | 0,200  | 0,184  | 0,100  | 0,544   | 0,552  | -0,444 | -0,192  | 1,000  | 0,400    | -0,444    | -0,252   | 0,515    | -0,331 |
|            | significance            | 0,159  | 0,540      | 0,202    | 0,653  |           | 0,041     | 0,783  | 0,634  | 0,800  | 0,135   | 0,128  | 0,234  | 0,646   | 0,333  | 0,750    | 0,234     | 0,506    | 0,158    | 0,415  |
| SOFATot-C  | correlation coefficient | -0,664 | 0,555      | -0,262   | 0,143  | 0,741     | 1,000     | -0,600 | 0,134  | 0,504  | 0,429   | 0,588  | -0,563 | 0,235   | 0,800  | 0,205    | -0,563    | -0,397   | -0,059   | 0,030  |
|            | significance            | 0,056  | 0,126      | 0,489    | 0,713  | 0,041     |           | 0,350  | 0,732  | 0,170  | 0,250   | 0,102  | 0,120  | 0,565   | 0,333  | 0,733    | 0,120     | 0,286    | 0,881    | 0,943  |
| APTT-C     | correlation coefficient | -0,791 | -0,400     | -0,051   | -0,300 | 0,200     | -0,600    | 1,000  | -0,300 | -0,400 | -0,100  | -0,300 | 0,600  | 0,000   | -0,500 | -1,000   | 0,000     | 0,103    | 0,200    | -0,600 |
|            | significance            | 0,133  | 0,517      | 1,000    | 0,683  | 0,783     | 0,350     |        | 0,683  | 0,517  | 0,950   | 0,683  | 0,350  | 1,000   | 1,000  | 0,333    | 1,000     | 0,900    | 0,783    | 0,350  |
| PCR-C      | correlation coefficient | 0,198  | 0,745      | 0,389    | 0,164  | 0,184     | 0,134     | -0,300 | 1,000  | 0,418  | 0,697   | 0,442  | 0,552  | 0,084   | 0,000  | -0,700   | 0,480     | 0,146    | -0,274   | 0,285  |
|            | significance            | 0,582  | 0,017      | 0,266    | 0,657  | 0,634     | 0,732     | 0,683  |        | 0,233  | 0,031   | 0,204  | 0,105  | 0,834   | 1,000  | 0,233    | 0,162     | 0,687    | 0,440    | 0,454  |
| PCT-C      | correlation coefficient | -0,179 | 0,624      | 0,182    | 0,115  | 0,100     | 0,504     | -0,400 | 0,418  | 1,000  | 0,382   | 0,527  | -0,261 | 0,494   | 0,200  | 0,300    | 0,085     | 0,036    | -0,354   | 0,100  |
|            | significance            | 0,619  | 0,060      | 0,614    | 0,759  | 0,800     | 0,170     | 0,517  | 0,233  |        | 0,279   | 0,123  | 0,470  | 0,180   | 0,917  | 0,683    | 0,818     | 0,926    | 0,314    | 0,800  |
| LEUCO-C    | correlation coefficient | -0,049 | 0,758      | -0,225   | 0,467  | 0,544     | 0,429     | -0,100 | 0,697  | 0,382  | 1,000   | 0,661  | 0,152  | 0,218   | 0,800  | -0,300   | 0,413     | 0,310    | 0,110    | 0,477  |
|            | significance            | 0,897  | 0,015      | 0,529    | 0,179  | 0,135     | 0,250     | 0,950  | 0,031  | 0,279  |         | 0,044  | 0,682  | 0,572   | 0,333  | 0,683    | 0,235     | 0,380    | 0,764    | 0,198  |
| PMN-C      | correlation coefficient | -0,031 | 0,539      | -0,486   | 0,115  | 0,552     | 0,588     | -0,300 | 0,442  | 0,527  | 0,661   | 1,000  | -0,152 | 0,126   | 1,000  | 0,300    | 0,164     | 0,085    | 0,018    | 0,134  |
|            | significance            | 0,938  | 0,114      | 0,157    | 0,759  | 0,128     | 0,102     | 0,683  | 0,204  | 0,123  | 0,044   |        | 0,682  | 0,751   | 0,083  | 0,683    | 0,649     | 0,818    | 0,966    | 0,732  |
| Plaq-C     | correlation coefficient | 0,463  | 0,236      | 0,419    | 0,273  | -0,444    | -0,563    | 0,600  | 0,552  | -0,261 | 0,152   | -0,152 | 1,000  | 0,008   | -0,800 | -0,300   | 0,723     | 0,267    | -0,378   | 0,301  |
|            | significance            | 0,180  | 0,513      | 0,227    | 0,448  | 0,234     | 0,120     | 0,350  | 0,105  | 0,470  | 0,682   | 0,682  |        | 0,992   | 0,333  | 0,683    | 0,022     | 0,452    | 0,280    | 0,428  |
| Quick-C    | correlation coefficient | -0,180 | 0,335      | -0,109   | 0,628  | -0,192    | 0,235     | 0,000  | 0,084  | 0,494  | 0,218   | 0,126  | 0,008  | 1,000   | -0,400 | -0,400   | 0,345     | 0,546    | -0,252   | 0,204  |
|            | significance            | 0,635  | 0,375      | 0,780    | 0,077  | 0,646     | 0,565     | 1,000  | 0,834  | 0,180  | 0,572   | 0,751  | 0,992  |         | 0,750  | 0,750    | 0,360     | 0,131    | 0,507    | 0,631  |
| DD-C       | correlation coefficient | 0,000  | 0,000      | -1,000   | -0,600 | 1,000     | 0,800     | -0,500 | 0,000  | 0,200  | 0,800   | 1,000  | -0,800 | -0,400  | 1,000  | 0,500    | -0,600    | 0,400    | 1,000    | -0,600 |
|            | significance            | 1,000  | 1,000      | 0,083    | 0,417  | 0,333     | 0,333     | 1,000  | 1,000  | 0,917  | 0,333   | 0,083  | 0,333  | 0,750   |        | 1,000    | 0,417     | 0,750    | 0,083    | 0,417  |
| TropUS-C   | correlation coefficient | 0,500  | -0,700     | -0,300   | -1,000 | 0,400     | 0,205     | -1,000 | -0,700 | 0,300  | -0,300  | 0,300  | -0,300 | -0,400  | 0,500  | 1,000    | -0,900    | -0,100   | 0,359    | -0,872 |
|            | significance            | 0,450  | 0,233      | 0,683    | 0,017  | 0,750     | 0,733     | 0,333  | 0,233  | 0,683  | 0,683   | 0,683  | 0,683  | 0,750   | 1,000  |          | 0,083     | 0,950    | 0,633    | 0,067  |
| FuncProtC  | correlation coefficient | 0,102  | -0,009     | 0,292    | 0,574  | -0,444    | -0,563    | 0,000  | 0,480  | 0,085  | 0,413   | 0,164  | 0,723  | 0,345   | -0,600 | -0,900   | 1,000     | 0,260    | -0,201   | 0,432  |
|            | significance            | 0,764  | 0,983      | 0,379    | 0,069  | 0,234     | 0,120     | 1,000  | 0,162  | 0,818  | 0,235   | 0,649  | 0,022  | 0,360   | 0,417  | 0,083    |           | 0,435    | 0,548    | 0,213  |
| APACHEII   | correlation coefficient | 0,527  | 0,205      | -0,486   | 0,055  | -0,252    | -0,397    | 0,103  | 0,146  | 0,036  | 0,310   | 0,085  | 0,267  | 0,546   | 0,400  | -0,100   | 0,260     | 1,000    | 0,451    | -0,085 |
|            | significance            | 0,098  | 0,543      | 0,130    | 0,875  | 0,506     | 0,286     | 0,900  | 0,687  | 0,926  | 0,380   | 0,818  | 0,452  | 0,131   | 0,750  | 0,950    | 0,435     |          | 0,164    | 0,815  |
| PROTOTAL   | correlation coefficient | 0,167  | -0,352     | -0,611   | -0,397 | 0,515     | -0,059    | 0,200  | -0,274 | -0,354 | 0,110   | 0,018  | -0,378 | -0,252  | 1,000  | 0,359    | -0,201    | 0,451    | 1,000    | -0,541 |
|            | significance            | 0,620  | 0,287      | 0,049    | 0,226  | 0,158     | 0,881     | 0,783  | 0,440  | 0,314  | 0,764   | 0,966  | 0,280  | 0,507   | 0,083  | 0,633    | 0,548     | 0,164    |          | 0,109  |
| LAC6H      | correlation coefficient | 0,058  | 0,450      | 0,122    | 0,790  | -0,331    | 0,030     | -0,600 | 0,285  | 0,100  | 0,477   | 0,134  | 0,301  | 0,204   | -0,600 | -0,872   | 0,432     | -0,085   | -0,541   | 1,000  |
|            | significance            | 0,874  | 0,194      | 0,736    | 0,009  | 0,415     | 0,943     | 0,350  | 0,454  | 0,800  | 0,198   | 0,732  | 0,428  | 0,631   | 0,417  | 0,067    | 0,213     | 0,815    | 0,109    |        |



**Supplementary Table S9.** Spearman's correlations in SS non-survivors' group, 1<sup>st</sup> sample collected.

|            |                         | Age    | CircHist-A | CitrH3-A | PCA-A  | Lactate-A | SOFATot-A | APTT-A | PCR-A  | PCT-A  | LEUCO-A | PMN-A  | Plaq-A | Quick-A | DD-A   | TropUS-A | FuncProtC | APACHEII | PROTOTAL | LAC6H  |
|------------|-------------------------|--------|------------|----------|--------|-----------|-----------|--------|--------|--------|---------|--------|--------|---------|--------|----------|-----------|----------|----------|--------|
| Age        | correlation coefficient | 1,000  | -0,865     | -0,954   | 0,363  | -0,617    | 0,131     | 0,291  | 0,090  | 0,140  | -0,561  | 0,452  | 0,159  | 0,371   | -0,165 | 0,343    | 0,284     | 0,284    | -0,054   | -0,342 |
|            | significance            |        | 0,000      | 0,000    | 0,127  | 0,005     | 0,593     | 0,227  | 0,713  | 0,569  | 0,012   | 0,052  | 0,516  | 0,117   | 0,499  | 0,150    | 0,239     | 0,239    | 0,827    | 0,152  |
| CircHist-A | correlation coefficient | -0,865 | 1,000      | 0,914    | -0,117 | 0,851     | -0,124    | 0,036  | -0,264 | -0,257 | 0,803   | -0,619 | -0,161 | -0,614  | -0,007 | -0,069   | -0,284    | -0,284   | -0,160   | 0,542  |
|            | significance            | 0,000  |            | 0,000    | 0,634  | 0,000     | 0,614     | 0,884  | 0,274  | 0,288  | 0,000   | 0,005  | 0,511  | 0,005   | 0,977  | 0,778    | 0,239     | 0,239    | 0,513    | 0,017  |
| CitrH3-A   | correlation coefficient | -0,954 | 0,914      | 1,000    | -0,292 | 0,696     | -0,157    | -0,205 | -0,199 | -0,241 | 0,629   | -0,572 | -0,198 | -0,489  | 0,065  | -0,199   | -0,317    | -0,317   | -0,024   | 0,473  |
|            | significance            | 0,000  | 0,000      |          | 0,225  | 0,001     | 0,521     | 0,401  | 0,413  | 0,319  | 0,004   | 0,011  | 0,418  | 0,034   | 0,791  | 0,413    | 0,186     | 0,186    | 0,923    | 0,041  |
| PCA-A      | correlation coefficient | 0,363  | -0,117     | -0,292   | 1,000  | 0,078     | 0,798     | 0,724  | 0,471  | 0,614  | 0,147   | 0,201  | 0,791  | 0,008   | 0,418  | 0,233    | 0,824     | 0,824    | 0,344    | -0,148 |
|            | significance            | 0,127  | 0,634      | 0,225    |        | 0,751     | 0,000     | 0,000  | 0,042  | 0,005  | 0,549   | 0,409  | 0,000  | 0,974   | 0,075  | 0,338    | 0,000     | 0,000    | 0,150    | 0,544  |
| Lactate-A  | correlation coefficient | -0,617 | 0,851      | 0,696    | 0,078  | 1,000     | -0,159    | 0,401  | -0,464 | -0,377 | 0,986   | -0,752 | -0,196 | -0,874  | -0,163 | 0,298    | -0,259    | -0,259   | -0,444   | 0,758  |
|            | significance            | 0,005  | 0,000      | 0,001    | 0,751  |           | 0,516     | 0,089  | 0,045  | 0,112  | 0,000   | 0,000  | 0,422  | 0,000   | 0,504  | 0,216    | 0,284     | 0,284    | 0,057    | 0,000  |
| SOFATot-A  | correlation coefficient | 0,131  | -0,124     | -0,157   | 0,798  | -0,159    | 1,000     | 0,322  | 0,816  | 0,882  | -0,124  | 0,468  | 0,995  | 0,377   | 0,785  | -0,248   | 0,968     | 0,968    | 0,776    | -0,478 |
|            | significance            | 0,593  | 0,614      | 0,521    | 0,000  | 0,516     |           | 0,179  | 0,000  | 0,000  | 0,614   | 0,043  | 0,000  | 0,112   | 0,000  | 0,305    | 0,000     | 0,000    | 0,000    | 0,038  |
| APTT-A     | correlation coefficient | 0,291  | 0,036      | -0,205   | 0,724  | 0,401     | 0,322     | 1,000  | -0,089 | 0,075  | 0,475   | -0,120 | 0,312  | -0,435  | -0,061 | 0,656    | 0,356     | 0,356    | -0,185   | 0,266  |
|            | significance            | 0,227  | 0,884      | 0,401    | 0,000  | 0,089     | 0,179     |        | 0,718  | 0,761  | 0,040   | 0,624  | 0,194  | 0,063   | 0,803  | 0,002    | 0,135     | 0,135    | 0,449    | 0,271  |
| PCR-A      | correlation coefficient | 0,090  | -0,264     | -0,199   | 0,471  | -0,464    | 0,816     | -0,089 | 1,000  | 0,939  | -0,440  | 0,719  | 0,824  | 0,700   | 0,832  | -0,591   | 0,789     | 0,789    | 0,937    | -0,784 |
|            | significance            | 0,713  | 0,274      | 0,413    | 0,042  | 0,045     | 0,000     | 0,718  |        | 0,000  | 0,059   | 0,001  | 0,000  | 0,001   | 0,000  | 0,008    | 0,000     | 0,000    | 0,000    | 0,000  |
| PCT-A      | correlation coefficient | 0,140  | -0,257     | -0,241   | 0,614  | -0,377    | 0,882     | 0,075  | 0,939  | 1,000  | -0,326  | 0,693  | 0,902  | 0,608   | 0,876  | -0,466   | 0,893     | 0,893    | 0,871    | -0,705 |
|            | significance            | 0,569  | 0,288      | 0,319    | 0,005  | 0,112     | 0,000     | 0,761  | 0,000  |        | 0,174   | 0,001  | 0,000  | 0,006   | 0,000  | 0,044    | 0,000     | 0,000    | 0,000    | 0,001  |
| LEUCO-A    | correlation coefficient | -0,561 | 0,803      | 0,629    | 0,147  | 0,986     | -0,124    | 0,475  | -0,440 | -0,326 | 1,000   | -0,714 | -0,154 | -0,888  | -0,142 | 0,354    | -0,212    | -0,212   | -0,436   | 0,745  |
|            | significance            | 0,012  | 0,000      | 0,004    | 0,549  | 0,000     | 0,614     | 0,040  | 0,059  | 0,174  |         | 0,001  | 0,530  | 0,000   | 0,561  | 0,137    | 0,385     | 0,385    | 0,062    | 0,000  |
| PMN-A      | correlation coefficient | 0,452  | -0,619     | -0,572   | 0,201  | -0,752    | 0,468     | -0,120 | 0,719  | 0,693  | -0,714  | 1,000  | 0,494  | 0,875   | 0,538  | -0,436   | 0,515     | 0,515    | 0,702    | -0,956 |
|            | significance            | 0,052  | 0,005      | 0,011    | 0,409  | 0,000     | 0,043     | 0,624  | 0,001  | 0,001  | 0,001   |        | 0,031  | 0,000   | 0,018  | 0,062    | 0,024     | 0,024    | 0,001    | 0,000  |
| Plaq-A     | correlation coefficient | 0,159  | -0,161     | -0,198   | 0,791  | -0,196    | 0,995     | 0,312  | 0,824  | 0,902  | -0,154  | 0,494  | 1,000  | 0,403   | 0,777  | -0,255   | 0,975     | 0,975    | 0,775    | -0,500 |
|            | significance            | 0,516  | 0,511      | 0,418    | 0,000  | 0,422     | 0,000     | 0,194  | 0,000  | 0,000  | 0,530   | 0,031  |        | 0,087   | 0,000  | 0,291    | 0,000     | 0,000    | 0,000    | 0,029  |
| QuickA     | correlation coefficient | 0,371  | -0,614     | -0,489   | 0,008  | -0,874    | 0,377     | -0,435 | 0,700  | 0,608  | -0,888  | 0,875  | 0,403  | 1,000   | 0,473  | -0,638   | 0,435     | 0,435    | 0,689    | -0,939 |
|            | significance            | 0,117  | 0,005      | 0,034    | 0,974  | 0,000     | 0,112     | 0,063  | 0,001  | 0,006  | 0,000   | 0,000  | 0,087  |         | 0,041  | 0,003    | 0,063     | 0,063    | 0,001    | 0,000  |
| DD-A       | correlation coefficient | -0,165 | -0,007     | 0,065    | 0,418  | -0,163    | 0,785     | -0,061 | 0,832  | 0,876  | -0,142  | 0,538  | 0,777  | 0,473   | 1,000  | -0,635   | 0,733     | 0,733    | 0,822    | -0,581 |
|            | significance            | 0,499  | 0,977      | 0,791    | 0,075  | 0,504     | 0,000     | 0,803  | 0,000  | 0,000  | 0,561   | 0,018  | 0,000  | 0,041   |        | 0,003    | 0,000     | 0,000    | 0,000    | 0,009  |
| TropUS-A   | correlation coefficient | 0,343  | -0,069     | -0,199   | 0,233  | 0,298     | -0,248    | 0,656  | -0,591 | -0,466 | 0,354   | -0,436 | -0,255 | -0,638  | -0,635 | 1,000    | -0,194    | -0,194   | -0,599   | 0,605  |
|            | significance            | 0,150  | 0,778      | 0,413    | 0,338  | 0,216     | 0,305     | 0,002  | 0,008  | 0,044  | 0,137   | 0,062  | 0,291  | 0,003   | 0,003  |          | 0,426     | 0,426    | 0,007    | 0,006  |
| FuncProtC  | correlation coefficient | 0,284  | -0,284     | -0,317   | 0,824  | -0,259    | 0,968     | 0,356  | 0,789  | 0,893  | -0,212  | 0,515  | 0,975  | 0,435   | 0,733  | -0,194   | 1,000     | 1,000    | 0,717    | -0,505 |
|            | significance            | 0,239  | 0,239      | 0,186    | 0,000  | 0,284     | 0,000     | 0,135  | 0,000  | 0,000  | 0,385   | 0,024  | 0,000  | 0,063   | 0,000  | 0,426    |           | 0,000    | 0,001    | 0,027  |
| APACHEII   | correlation coefficient | 0,284  | -0,284     | -0,317   | 0,824  | -0,259    | 0,968     | 0,356  | 0,789  | 0,893  | -0,212  | 0,515  | 0,975  | 0,435   | 0,733  | -0,194   | 1,000     | 1,000    | 0,717    | -0,505 |
|            | significance            | 0,239  | 0,239      | 0,186    | 0,000  | 0,284     | 0,000     | 0,135  | 0,000  | 0,000  | 0,385   | 0,024  | 0,000  | 0,063   | 0,000  | 0,426    |           |          | 0,001    | 0,027  |
| PROTOTAL   | correlation coefficient | -0,054 | -0,160     | -0,024   | 0,344  | -0,444    | 0,776     | -0,185 | 0,937  | 0,871  | -0,436  | 0,702  | 0,775  | 0,689   | 0,822  | -0,599   | 0,717     | 0,717    | 1,000    | -0,754 |
|            | significance            | 0,827  | 0,513      | 0,923    | 0,150  | 0,057     | 0,000     | 0,449  | 0,000  | 0,000  | 0,062   | 0,001  | 0,000  | 0,001   | 0,000  | 0,007    | 0,001     | 0,001    |          | 0,000  |
| LAC6H      | correlation coefficient | -0,342 | 0,542      | 0,473    | -0,148 | 0,758     | -0,478    | 0,266  | -0,784 | -0,705 | 0,745   | -0,956 | -0,500 | -0,939  | -0,581 | 0,605    | -0,505    | -0,505   | -0,754   | 1,000  |
|            | significance            | 0,152  | 0,017      | 0,041    | 0,544  | 0,000     | 0,038     | 0,271  | 0,000  | 0,001  | 0,000   | 0,000  | 0,029  | 0,000   | 0,009  | 0,006    | 0,027     | 0,027    | 0,000    |        |



**Supplementary Table S10.** Spearman's correlations in SS non-survivors' group, 2<sup>nd</sup> sample collected.

|            |                         | Age    | CircHist-B | CitrH3-B | PCA-B  | Lactate-B | SOFATot-B | APTT-B | PCR-B  | PCT-B  | LEUCO-B | PMN-B  | Plaq-B | Quick-B | DD-B | TropUS-B | FuncProtC | APACHEII | PROTOTAL | LAC6H  |
|------------|-------------------------|--------|------------|----------|--------|-----------|-----------|--------|--------|--------|---------|--------|--------|---------|------|----------|-----------|----------|----------|--------|
| Age        | correlation coefficient | 1,000  | -0,400     | -0,800   | 0,800  | -0,200    | 0,400     | 1,000  | 0,200  | 0,400  | -0,400  | 0,800  | 0,600  | 0,200   |      | 0,500    | 0,600     | 0,600    | -0,500   | -0,400 |
|            | significance            |        | 0,385      | 0,038    | 0,038  | 0,717     | 0,385     | 0,022  | 0,717  | 0,385  | 0,385   | 0,038  | 0,166  | 0,717   |      | 0,422    | 0,166     | 0,166    | 0,422    | 0,385  |
| CircHist-B | correlation coefficient | -0,400 | 1,000      | 0,800    | 0,200  | 0,000     | 0,400     | -0,500 | 0,000  | -0,600 | 0,600   | 0,200  | 0,400  | 0,000   |      | -1,000   | 0,400     | 0,400    | 1,000    | -0,400 |
|            | significance            | 0,385  |            | 0,038    | 0,717  | 1,000     | 0,385     | 0,422  | 1,000  | 0,166  | 0,166   | 0,717  | 0,385  | 1,000   |      | 0,022    | 0,385     | 0,385    | 0,022    | 0,385  |
| CitrH3-B   | correlation coefficient | -0,800 | 0,800      | 1,000    | -0,400 | 0,400     | -0,200    | -0,500 | -0,400 | -0,800 | 0,800   | -0,400 | 0,000  | -0,400  |      | -1,000   | 0,000     | 0,000    | 0,500    | 0,200  |
|            | significance            | 0,038  | 0,038      |          | 0,385  | 0,385     | 0,717     | 0,422  | 0,385  | 0,038  | 0,038   | 0,385  | 1,000  | 0,385   |      | 0,022    | 1,000     | 1,000    | 0,422    | 0,717  |
| PCA-B      | correlation coefficient | 0,800  | 0,200      | -0,400   | 1,000  | -0,400    | 0,800     | 0,500  | 0,400  | 0,200  | -0,200  | 1,000  | 0,800  | 0,400   |      | -0,500   | 0,800     | 0,800    | 0,500    | -0,800 |
|            | significance            | 0,038  | 0,717      | 0,385    |        | 0,385     | 0,038     | 0,422  | 0,385  | 0,717  | 0,717   | 0,001  | 0,038  | 0,385   |      | 0,422    | 0,038     | 0,038    | 0,422    | 0,038  |
| Lactate-B  | correlation coefficient | -0,200 | 0,000      | 0,400    | -0,400 | 1,000     | -0,800    | 1,000  | -1,000 | -0,800 | 0,800   | -0,400 | 0,200  | -1,000  |      | 0,500    | 0,200     | 0,200    | -0,500   | 0,800  |
|            | significance            | 0,717  | 1,000      | 0,385    | 0,385  |           | 0,038     | 0,022  | 0,001  | 0,038  | 0,038   | 0,385  | 0,717  | 0,001   |      | 0,422    | 0,717     | 0,717    | 0,422    | 0,038  |
| SOFATot-B  | correlation coefficient | 0,400  | 0,400      | -0,200   | 0,800  | -0,800    | 1,000     | -0,500 | 0,800  | 0,400  | -0,400  | 0,800  | 0,400  | 0,800   |      | -1,000   | 0,400     | 0,400    | 0,500    | -1,000 |
|            | significance            | 0,385  | 0,385      | 0,717    | 0,038  | 0,038     |           | 0,422  | 0,038  | 0,385  | 0,385   | 0,038  | 0,385  | 0,038   |      | 0,022    | 0,385     | 0,385    | 0,422    | 0,001  |
| APTT-B     | correlation coefficient | 1,000  | -0,500     | -0,500   | 0,500  | 1,000     | -0,500    | 1,000  | -1,000 | -0,500 | 0,500   | 0,500  | 0,500  | -1,000  |      | 0,500    | 0,500     | 0,500    | -1,000   | 0,500  |
|            | significance            | 0,022  | 0,422      | 0,422    | 0,422  | 0,022     | 0,422     |        | 0,022  | 0,422  | 0,422   | 0,422  | 0,422  | 0,022   |      | 0,422    | 0,422     | 0,422    | 0,333    | 0,422  |
| PCR-B      | correlation coefficient | 0,200  | 0,000      | -0,400   | 0,400  | -1,000    | 0,800     | -1,000 | 1,000  | 0,800  | -0,800  | 0,400  | -0,200 | 1,000   |      | -0,500   | -0,200    | -0,200   | 0,500    | -0,800 |
|            | significance            |        |            |          |        |           |           |        |        |        |         |        |        |         |      |          |           |          |          |        |
| PCT-B      | correlation coefficient | 0,400  | -0,600     | -0,800   | 0,200  | -0,800    | 0,400     | -0,500 | 0,800  | 1,000  | -1,000  | 0,200  | -0,400 | 0,800   |      | 0,500    | -0,400    | -0,400   | -0,500   | -0,400 |
|            | significance            | 0,717  | 1,000      | 0,385    | 0,385  | 0,001     | 0,038     | 0,022  |        | 0,038  | 0,038   | 0,385  | 0,717  | 0,001   |      | 0,422    | 0,717     | 0,717    | 0,422    | 0,038  |
| LEUCO-B    | correlation coefficient | -0,400 | 0,600      | 0,800    | -0,200 | 0,800     | -0,400    | 0,500  | -0,800 | -1,000 | 1,000   | -0,200 | 0,400  | -0,800  |      | -0,500   | 0,400     | 0,400    | 0,500    | 0,400  |
|            | significance            | 0,385  | 0,166      | 0,038    | 0,717  | 0,038     | 0,385     | 0,422  | 0,038  | 0,001  |         | 0,717  | 0,385  | 0,038   |      | 0,422    | 0,385     | 0,385    | 0,422    | 0,385  |
| PMN-B      | correlation coefficient | 0,800  | 0,200      | -0,400   | 1,000  | -0,400    | 0,800     | 0,500  | 0,400  | 0,200  | -0,200  | 1,000  | 0,800  | 0,400   |      | -0,500   | 0,800     | 0,800    | 0,500    | -0,800 |
|            | significance            | 0,038  | 0,717      | 0,385    | 0,001  | 0,385     | 0,038     | 0,422  | 0,385  | 0,717  | 0,717   |        | 0,038  | 0,385   |      | 0,422    | 0,038     | 0,038    | 0,422    | 0,038  |
| Plaq-B     | correlation coefficient | 0,600  | 0,400      | 0,000    | 0,800  | 0,200     | 0,400     | 0,500  | -0,200 | -0,400 | 0,400   | 0,800  | 1,000  | -0,200  |      | -0,500   | 1,000     | 1,000    | 0,500    | -0,400 |
|            | significance            | 0,166  | 0,385      | 1,000    | 0,038  | 0,717     | 0,385     | 0,422  | 0,717  | 0,385  | 0,385   | 0,038  |        | 0,717   |      | 0,422    | 0,001     | 0,001    | 0,422    | 0,385  |
| Quick-B    | correlation coefficient | 0,200  | 0,000      | -0,400   | 0,400  | -1,000    | 0,800     | -1,000 | 1,000  | 0,800  | -0,800  | 0,400  | -0,200 | 1,000   |      | -0,500   | -0,200    | -0,200   | 0,500    | -0,800 |
|            | significance            | 0,717  | 1,000      | 0,385    | 0,385  | 0,001     | 0,038     | 0,022  | 0,001  | 0,038  | 0,038   | 0,385  | 0,717  |         |      | 0,422    | 0,717     | 0,717    | 0,422    | 0,038  |
| DD-B       | correlation coefficient |        |            |          |        |           |           |        |        |        |         |        |        |         |      |          |           |          |          |        |
|            | significance            |        |            |          |        |           |           |        |        |        |         |        |        |         |      |          |           |          |          |        |
| TropUS-B   | correlation coefficient | 0,500  | -1,000     | -1,000   | -0,500 | 0,500     | -1,000    | 0,500  | -0,500 | 0,500  | -0,500  | -0,500 | -0,500 | -0,500  |      | 1,000    | -0,500    | -0,500   | -1,000   | 1,000  |
|            | significance            | 0,422  | 0,022      | 0,022    | 0,422  | 0,422     | 0,022     | 0,422  | 0,422  | 0,422  | 0,422   | 0,422  | 0,422  | 0,422   |      |          | 0,422     | 0,422    | 0,333    | 0,022  |
| FuncProtC  | correlation coefficient | 0,600  | 0,400      | 0,000    | 0,800  | 0,200     | 0,400     | 0,500  | -0,200 | -0,400 | 0,400   | 0,800  | 1,000  | -0,200  |      | -0,500   | 1,000     | 1,000    | 0,500    | -0,400 |
|            | significance            | 0,166  | 0,385      | 1,000    | 0,038  | 0,717     | 0,385     | 0,422  | 0,717  | 0,385  | 0,385   | 0,038  | 0,001  | 0,717   |      | 0,422    |           | 0,001    | 0,422    | 0,385  |
| APACHEII   | correlation coefficient | 0,600  | 0,400      | 0,000    | 0,800  | 0,200     | 0,400     | 0,500  | -0,200 | -0,400 | 0,400   | 0,800  | 1,000  | -0,200  |      | -0,500   | 1,000     | 1,000    | 0,500    | -0,400 |
|            | significance            | 0,166  | 0,385      | 1,000    | 0,038  | 0,717     | 0,385     | 0,422  | 0,717  | 0,385  | 0,385   | 0,038  | 0,001  | 0,717   |      | 0,422    | 0,001     |          | 0,422    | 0,385  |
| PROTOTAL   | correlation coefficient | -0,500 | 1,000      | 0,500    | 0,500  | -0,500    | 0,500     | -1,000 | 0,500  | -0,500 | 0,500   | 0,500  | 0,500  | 0,500   |      | -1,000   | 0,500     | 0,500    | 1,000    | -0,500 |
|            | significance            | 0,422  | 0,022      | 0,422    | 0,422  | 0,422     | 0,422     | 0,333  | 0,422  | 0,422  | 0,422   | 0,422  | 0,422  | 0,422   |      | 0,333    | 0,422     | 0,422    |          | 0,422  |
| LAC6H      | correlation coefficient | -0,400 | -0,400     | 0,200    | -0,800 | 0,800     | -1,000    | 0,500  | -0,800 | -0,400 | 0,400   | -0,800 | -0,400 | -0,800  |      | 1,000    | -0,400    | -0,400   | -0,500   | 1,000  |
|            | significance            | 0,385  | 0,385      | 0,717    | 0,038  | 0,038     | 0,001     | 0,422  | 0,038  | 0,385  | 0,385   | 0,038  | 0,385  | 0,038   |      | 0,022    | 0,385     | 0,385    | 0,422    |        |



**Supplementary Table S11.** Spearman's correlations in SS non-survivors' group, 3<sup>rd</sup> sample collected.

|            |                         | Age    | CircHist-C | CitrH3-C | PCA-C  | Lactate-C | SOFATot-C | APTT-C | PCR-C  | PCT-C  | LEUCO-C | PMN-C  | Plaq-C | Quick-C | DD-C | TropUS-C | FuncProtC | APACHEII | PROTOTAL | LAC6H  |
|------------|-------------------------|--------|------------|----------|--------|-----------|-----------|--------|--------|--------|---------|--------|--------|---------|------|----------|-----------|----------|----------|--------|
| Age        | correlation coefficient | 1,000  | 0,800      | -0,200   | 0,400  | -0,400    | 0,400     | 1,000  | -0,600 | 0,400  | 0,800   | -0,200 | 1,000  | 0,400   |      | 0,500    | 0,600     | 0,600    | -0,500   | -0,400 |
|            | significance            |        | 0,038      | 0,717    | 0,385  | 0,385     | 0,385     | 0,022  | 0,166  | 0,385  | 0,038   | 0,717  | 0,001  | 0,385   |      | 0,422    | 0,166     | 0,166    | 0,422    | 0,385  |
| CircHist-C | correlation coefficient | 0,800  | 1,000      | 0,400    | -0,200 | 0,000     | 0,000     | 1,000  | -0,800 | -0,200 | 1,000   | -0,400 | 0,800  | -0,200  |      | 0,500    | 0,800     | 0,800    | -0,500   | 0,000  |
|            | significance            | 0,038  |            | 0,385    | 0,717  | 1,000     | 1,000     | 0,022  | 0,038  | 0,717  | 0,001   | 0,385  | 0,038  | 0,717   |      | 0,422    | 0,038     | 0,038    | 0,422    | 1,000  |
| CitrH3-C   | correlation coefficient | -0,200 | 0,400      | 1,000    | -0,800 | 0,800     | -0,800    | 1,000  | -0,200 | -0,800 | 0,400   | -0,600 | -0,200 | -0,800  |      | 0,500    | 0,200     | 0,200    | -0,500   | 0,800  |
|            | significance            | 0,717  | 0,385      |          | 0,038  | 0,038     | 0,038     | 0,022  | 0,717  | 0,038  | 0,385   | 0,166  | 0,717  | 0,038   |      | 0,422    | 0,717     | 0,717    | 0,422    | 0,038  |
| PCA-C      | correlation coefficient | 0,400  | -0,200     | -0,800   | 1,000  | -0,400    | 0,400     | -0,500 | 0,400  | 1,000  | -0,200  | 0,000  | 0,400  | 1,000   |      | 0,500    | -0,400    | -0,400   | -0,500   | -0,400 |
|            | significance            | 0,385  | 0,717      | 0,038    |        | 0,385     | 0,385     | 0,422  | 0,385  | 0,001  | 0,717   | 1,000  | 0,385  | 0,001   |      | 0,422    | 0,385     | 0,385    | 0,422    | 0,385  |
| Lactate-C  | correlation coefficient | -0,400 | 0,000      | 0,800    | -0,400 | 1,000     | -1,000    | 0,500  | 0,400  | -0,400 | 0,000   | -0,800 | -0,400 | -0,400  |      | 1,000    | -0,400    | -0,400   | -0,500   | 1,000  |
|            | significance            | 0,385  | 1,000      | 0,038    | 0,385  |           | 0,001     | 0,422  | 0,385  | 0,385  | 1,000   | 0,038  | 0,385  | 0,385   |      | 0,022    | 0,385     | 0,385    | 0,422    | 0,001  |
| SOFATot-C  | correlation coefficient | 0,400  | 0,000      | -0,800   | 0,400  | -1,000    | 1,000     | -0,500 | -0,400 | 0,400  | 0,000   | 0,800  | 0,400  | 0,400   |      | -1,000   | 0,400     | 0,400    | 0,500    | -1,000 |
|            | significance            | 0,385  | 1,000      | 0,038    | 0,385  | 0,001     |           | 0,422  | 0,385  | 0,385  | 1,000   | 0,038  | 0,385  | 0,385   |      | 0,022    | 0,385     | 0,385    | 0,422    | 0,001  |
| APTT-C     | correlation coefficient | 1,000  | 1,000      | 1,000    | -0,500 | 0,500     | -0,500    | 1,000  | -0,500 | -0,500 | 1,000   | -0,500 | 1,000  | -0,500  |      | 0,500    | 0,500     | 0,500    | -1,000   | 0,500  |
|            | significance            | 0,022  | 0,022      | 0,022    | 0,422  | 0,422     | 0,422     |        | 0,422  | 0,422  | 0,022   | 0,422  | 0,022  | 0,422   |      | 0,422    | 0,422     | 0,422    | 0,333    | 0,422  |
| PCR-C      | correlation coefficient | -0,600 | -0,800     | -0,200   | 0,400  | 0,400     | -0,400    | -0,500 | 1,000  | 0,400  | -0,800  | -0,200 | -0,600 | 0,400   |      | 0,500    | -1,000    | -1,000   | -0,500   | 0,400  |
|            | significance            | 0,166  | 0,038      | 0,717    | 0,385  | 0,385     | 0,385     | 0,422  |        | 0,385  | 0,038   | 0,717  | 0,166  | 0,385   |      | 0,422    | 0,001     | 0,001    | 0,422    | 0,385  |
| PCT-C      | correlation coefficient | 0,400  | -0,200     | -0,800   | 1,000  | -0,400    | 0,400     | -0,500 | 0,400  | 1,000  | -0,200  | 0,000  | 0,400  | 1,000   |      | 0,500    | -0,400    | -0,400   | -0,500   | -0,400 |
|            | significance            | 0,385  | 0,717      | 0,038    | 0,001  | 0,385     | 0,385     | 0,422  | 0,385  |        | 0,717   | 1,000  | 0,385  | 0,001   |      | 0,422    | 0,385     | 0,385    | 0,422    | 0,385  |
| LEUCO-C    | correlation coefficient | 0,800  | 1,000      | 0,400    | -0,200 | 0,000     | 0,000     | 1,000  | -0,800 | -0,200 | 1,000   | -0,400 | 0,800  | -0,200  |      | 0,500    | 0,800     | 0,800    | -0,500   | 0,000  |
|            | significance            | 0,038  | 0,001      | 0,385    | 0,717  | 1,000     | 1,000     | 0,022  | 0,038  | 0,717  |         | 0,385  | 0,038  | 0,717   |      | 0,422    | 0,038     | 0,038    | 0,422    | 1,000  |
| PMN-C      | correlation coefficient | -0,200 | -0,400     | -0,600   | 0,000  | -0,800    | 0,800     | -0,500 | -0,200 | 0,000  | -0,400  | 1,000  | -0,200 | 0,000   |      | -1,000   | 0,200     | 0,200    | 1,000    | -0,800 |
|            | significance            | 0,717  | 0,385      | 0,166    | 1,000  | 0,038     | 0,038     | 0,422  | 0,717  | 1,000  | 0,385   |        | 0,717  | 1,000   |      | 0,022    | 0,717     | 0,717    | 0,022    | 0,038  |
| Plaq-C     | correlation coefficient | 1,000  | 0,800      | -0,200   | 0,400  | -0,400    | 0,400     | 1,000  | -0,600 | 0,400  | 0,800   | -0,200 | 1,000  | 0,400   |      | 0,500    | 0,600     | 0,600    | -0,500   | -0,400 |
|            | significance            | 0,001  | 0,038      | 0,717    | 0,385  | 0,385     | 0,385     | 0,022  | 0,166  | 0,385  | 0,038   | 0,717  |        | 0,385   |      | 0,422    | 0,166     | 0,166    | 0,422    | 0,385  |
| Quick-C    | correlation coefficient | 0,400  | -0,200     | -0,800   | 1,000  | -0,400    | 0,400     | -0,500 | 0,400  | 1,000  | -0,200  | 0,000  | 0,400  | 1,000   |      | 0,500    | -0,400    | -0,400   | -0,500   | -0,400 |
|            | significance            | 0,385  | 0,717      | 0,038    | 0,001  | 0,385     | 0,385     | 0,422  | 0,385  | 0,001  | 0,717   | 1,000  | 0,385  |         |      | 0,422    | 0,385     | 0,385    | 0,422    | 0,385  |
| DD-C       | correlation coefficient |        |            |          |        |           |           |        |        |        |         |        |        |         |      |          |           |          |          |        |
|            | significance            |        |            |          |        |           |           |        |        |        |         |        |        |         |      |          |           |          |          |        |
| TropUS-C   | correlation coefficient | 0,500  | 0,500      | 0,500    | 0,500  | 1,000     | -1,000    | 0,500  | 0,500  | 0,500  | 0,500   | -1,000 | 0,500  | 0,500   |      | 1,000    | -0,500    | -0,500   | -1,000   | 1,000  |
|            | significance            | 0,422  | 0,422      | 0,422    | 0,422  | 0,022     | 0,022     | 0,422  | 0,422  | 0,422  | 0,422   | 0,022  | 0,422  | 0,422   |      |          | 0,422     | 0,422    | 0,333    | 0,022  |
| FuncProtC  | correlation coefficient | 0,600  | 0,800      | 0,200    | -0,400 | -0,400    | 0,400     | 0,500  | -1,000 | -0,400 | 0,800   | 0,200  | 0,600  | -0,400  |      | -0,500   | 1,000     | 1,000    | 0,500    | -0,400 |
|            | significance            | 0,166  | 0,038      | 0,717    | 0,385  | 0,385     | 0,385     | 0,422  | 0,001  | 0,385  | 0,038   | 0,717  | 0,166  | 0,385   |      |          |           | 0,001    | 0,422    | 0,385  |
| APACHEII   | correlation coefficient | 0,600  | 0,800      | 0,200    | -0,400 | -0,400    | 0,400     | 0,500  | -1,000 | -0,400 | 0,800   | 0,200  | 0,600  | -0,400  |      | -0,500   | 1,000     | 1,000    | 0,500    | -0,400 |
|            | significance            | 0,166  | 0,038      | 0,717    | 0,385  | 0,385     | 0,385     | 0,422  | 0,001  | 0,385  | 0,038   | 0,717  | 0,166  | 0,385   |      | 0,422    | 0,001     |          | 0,422    | 0,385  |
| PROTOTAL   | correlation coefficient | -0,500 | -0,500     | -0,500   | -0,500 | -0,500    | 0,500     | -1,000 | -0,500 | -0,500 | -0,500  | 1,000  | -0,500 | -0,500  |      | -1,000   | 0,500     | 0,500    | 1,000    | -0,500 |
|            | significance            | 0,422  | 0,422      | 0,422    | 0,422  | 0,422     | 0,422     | 0,333  | 0,422  | 0,422  | 0,422   | 0,022  | 0,422  | 0,422   |      | 0,333    | 0,422     | 0,422    |          | 0,422  |
| LAC6H      | correlation coefficient | -0,400 | 0,000      | 0,800    | -0,400 | 1,000     | -1,000    | 0,500  | 0,400  | -0,400 | 0,000   | -0,800 | -0,400 | -0,400  |      | 1,000    | -0,400    | -0,400   | -0,500   | 1,000  |
|            | significance            | 0,385  | 1,000      | 0,038    | 0,385  | 0,001     | 0,001     | 0,422  | 0,385  | 0,385  | 1,000   | 0,038  | 0,385  | 0,385   |      | 0,022    | 0,385     | 0,385    | 0,422    |        |
